# Supplementary material for: Regioselective oxidation and metalation of meso-unsubstituted azuliporphyrins
Source: Royal Society of Chemistry journal article supplement (doi:10.1039/c6ob02052f), 2016-01-01
Supplement: c6ob02052f2.pdf [file c6ob02052f2.pdf]

## Regioselective Oxidation and Metalation of *meso*-Unsubstituted Azuliporphyrins

Venkata A. K. Adiraju, Gregory M. Ferrence and Timothy D. Lash

Department of Chemistry, Illinois State University, Normal, Illinois 61790-4160

E-mail: [tplash@ilstu.edu](mailto:tplash@ilstu.edu)

### Table of Contents

#### Page

|         |                                                                                                                                                         |
|---------|---------------------------------------------------------------------------------------------------------------------------------------------------------|
| S2-S5   | Crystallographic Experimental Details                                                                                                                   |
| S6-S7   | Summary of framework bond distances (Å) and angles (°) for <b>16a</b> , <b>17a</b> and <b>18b</b> (Table S1)                                            |
| S8-S15  | Selected views for the X-ray crystal structures of <b>16a</b> , <b>17a</b> and <b>18b</b> (Figures S1-S11)                                              |
| S16-S26 | Selected UV-vis spectra (Figures S12-S33)                                                                                                               |
| S27-S64 | Selected proton NMR, <sup>1</sup> H- <sup>1</sup> H COSY, HSQC, nOe difference <sup>1</sup> H NMR, DEPT-135 and carbon-13 NMR spectra (Figures S34-S86) |
| S65-S84 | ESI MS (Figures S87-S106)                                                                                                                               |

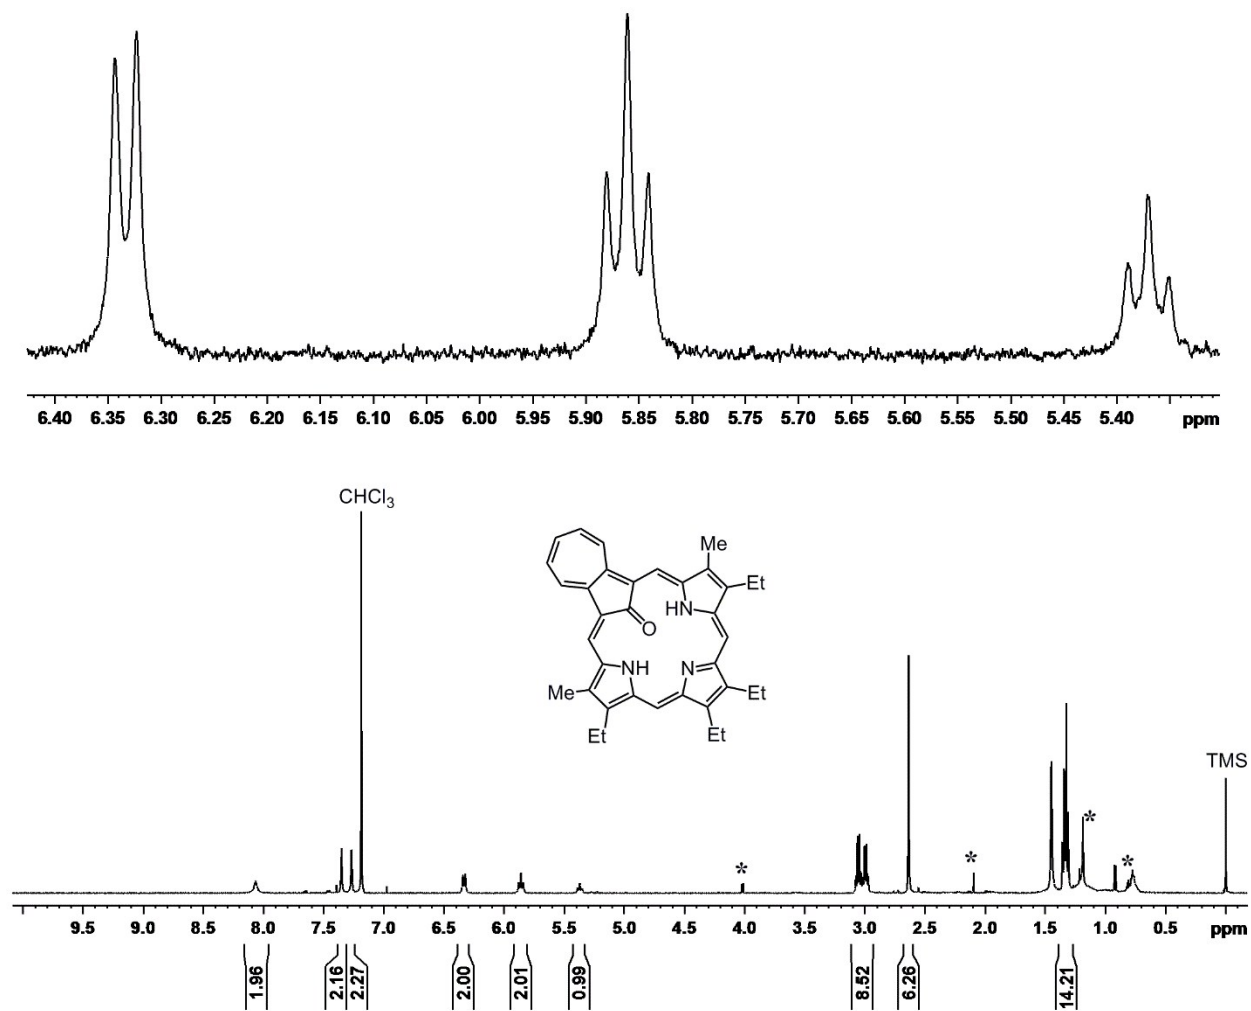

Figure S53. 500 MHz proton NMR spectrum of oxyazuliporphyrin **18b** in CDCl<sub>3</sub>.  
\* solvent impurities

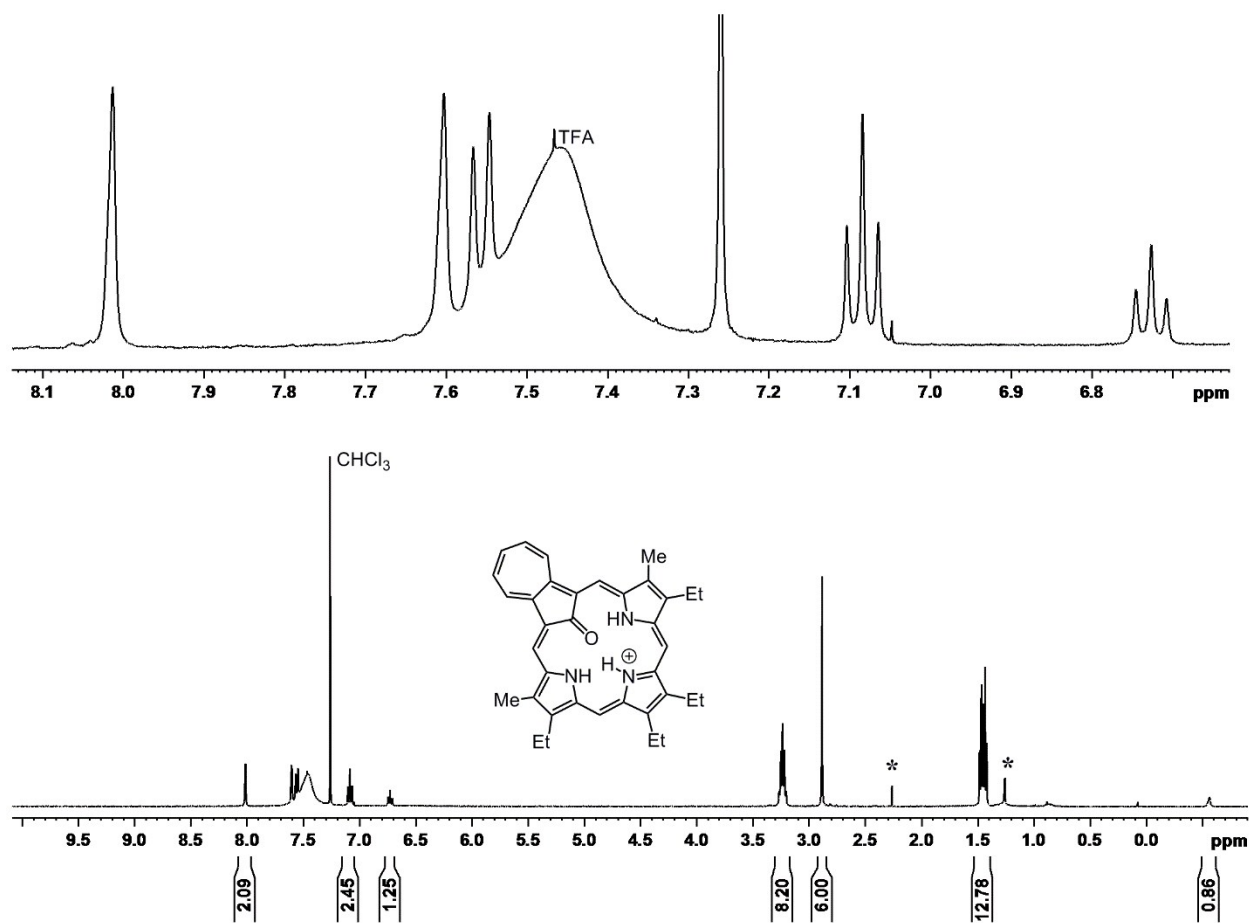

Figure S54. 500 MHz proton NMR spectrum of monoprotonated oxyazuliporphyrin **16bH<sup>+</sup>** in TFA-CDCl<sub>3</sub>.  
\* solvent impurities

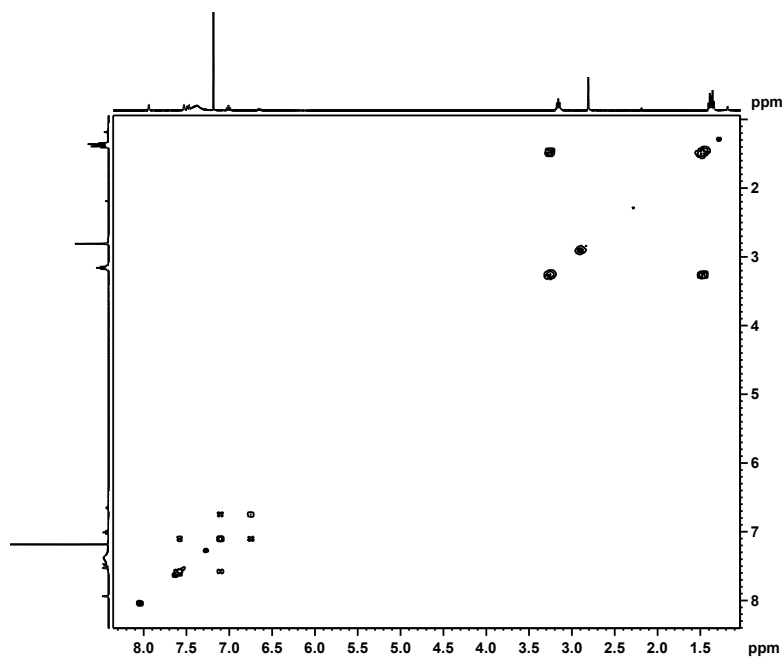

Figure S55. <sup>1</sup>H-<sup>1</sup>H COSY NMR spectrum of **16bH<sup>+</sup>** in TFA-CDCl<sub>3</sub>.

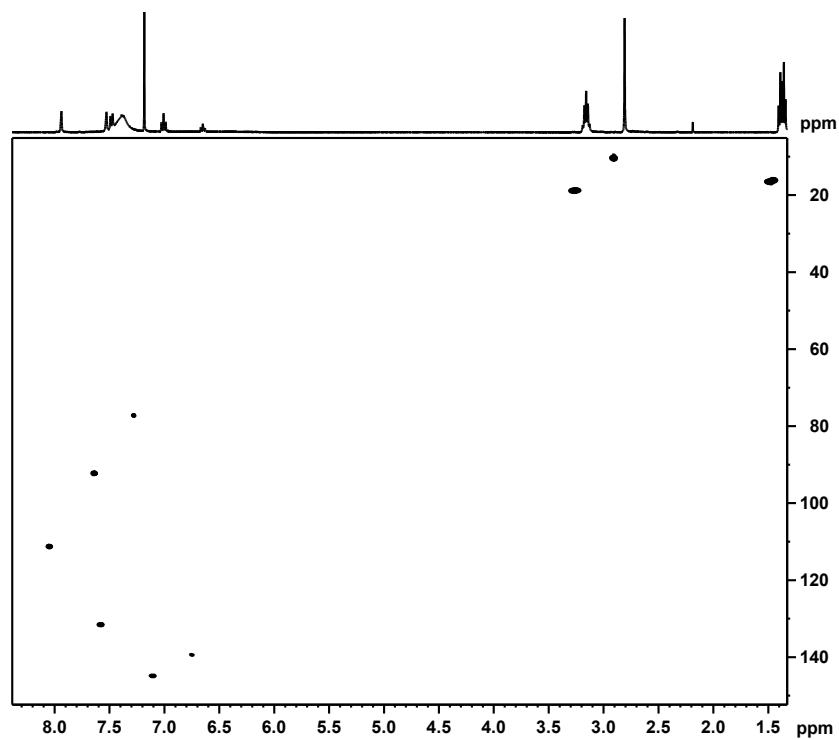

Figure S56. HSQC NMR spectrum of **16bH<sup>+</sup>** in TFA-CDCl<sub>3</sub>.

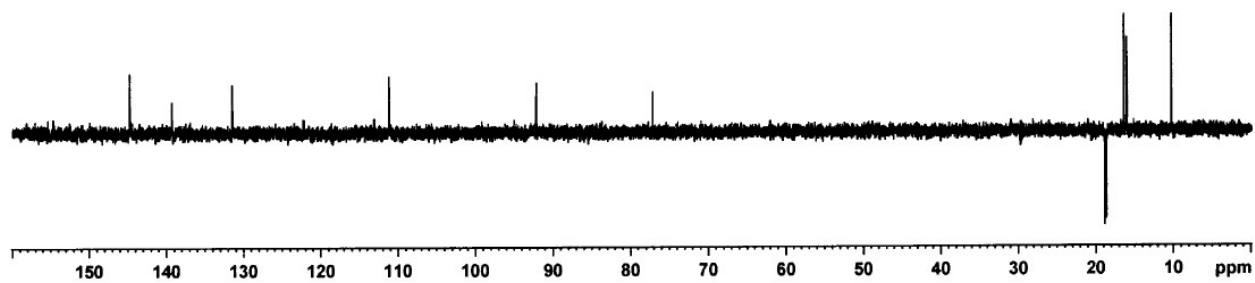

Figure S57. DEPT-135 NMR spectrum of **16bH<sup>+</sup>** in TFA-CDCl<sub>3</sub>.

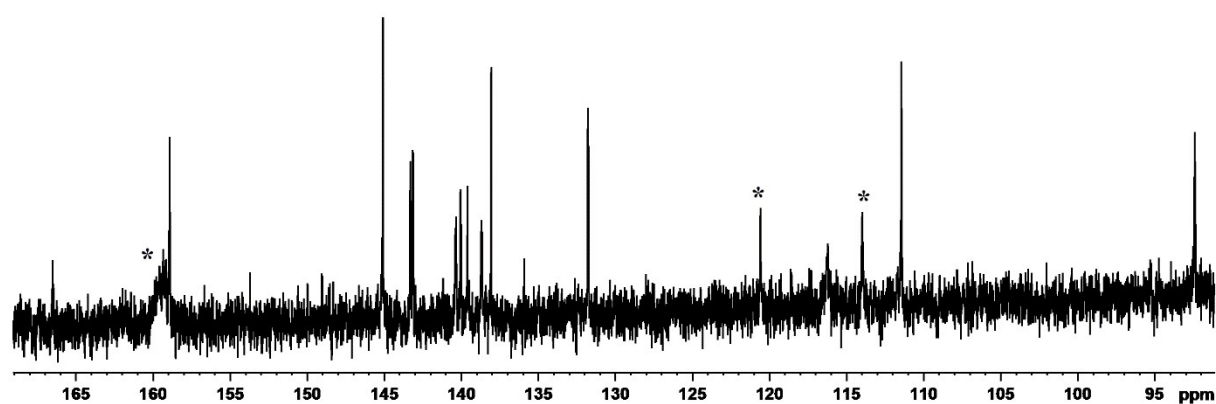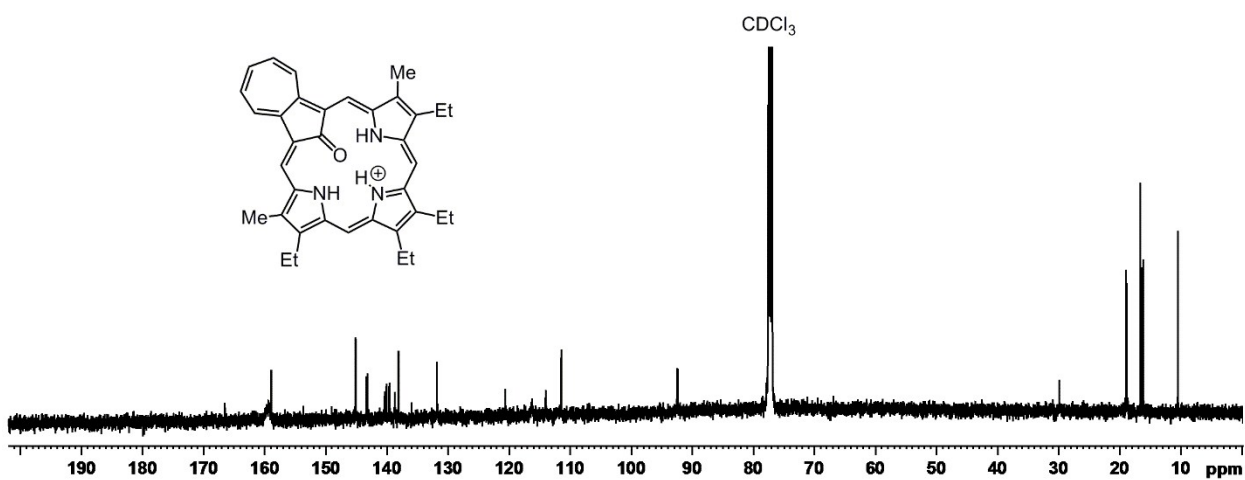

Figure S58. 125 MHz carbon-13 NMR spectrum of **16bH<sup>+</sup>** in trace TFA-CDCl<sub>3</sub>.

\* TFA

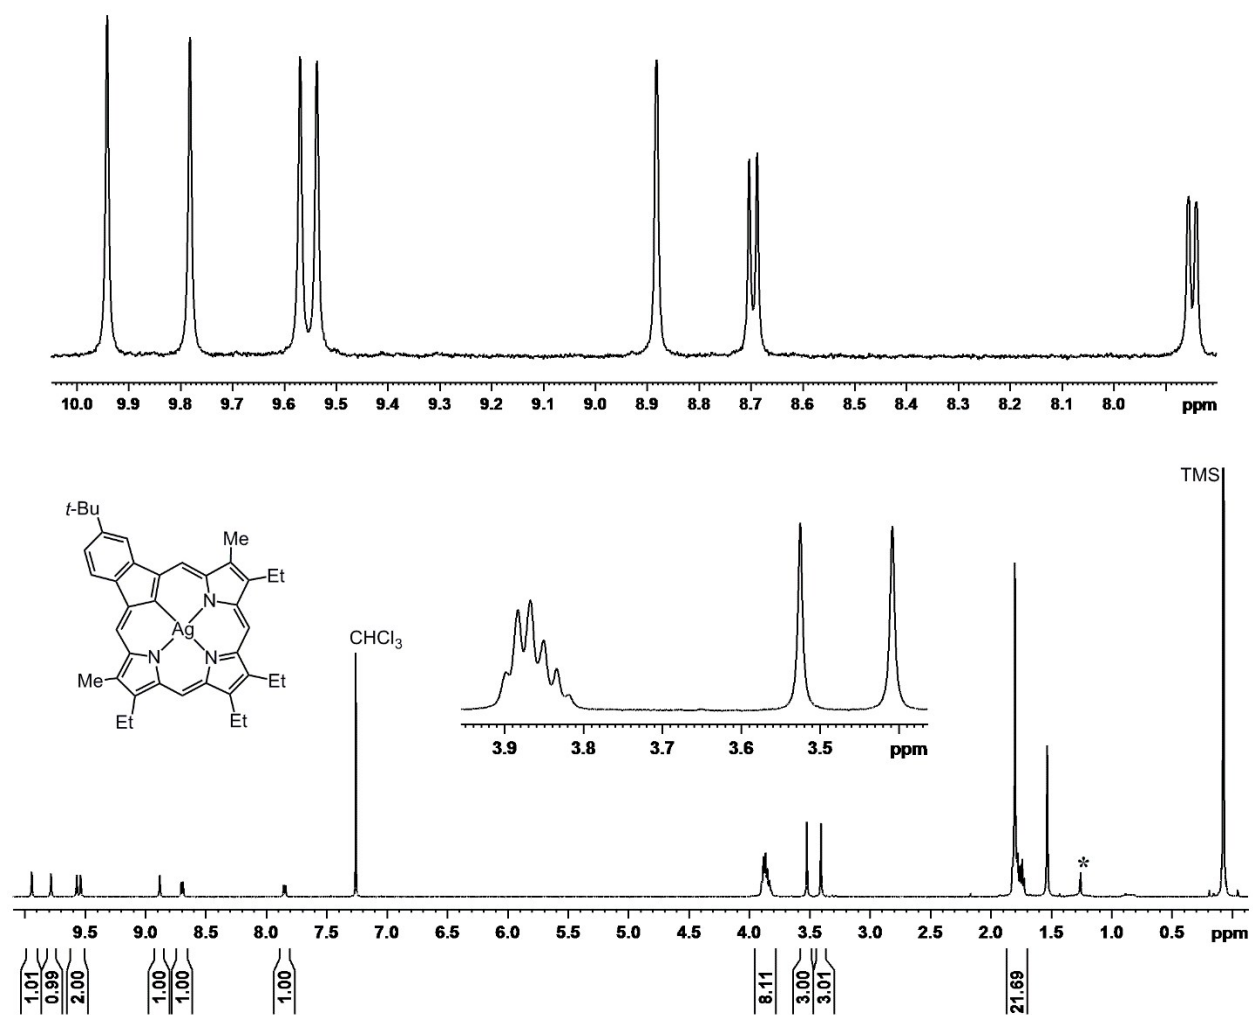

Figure S59. 500 MHz proton NMR spectrum of silver(III) *tert*-butylbenzocarbaporphyrin **21a** in CDCl<sub>3</sub>.

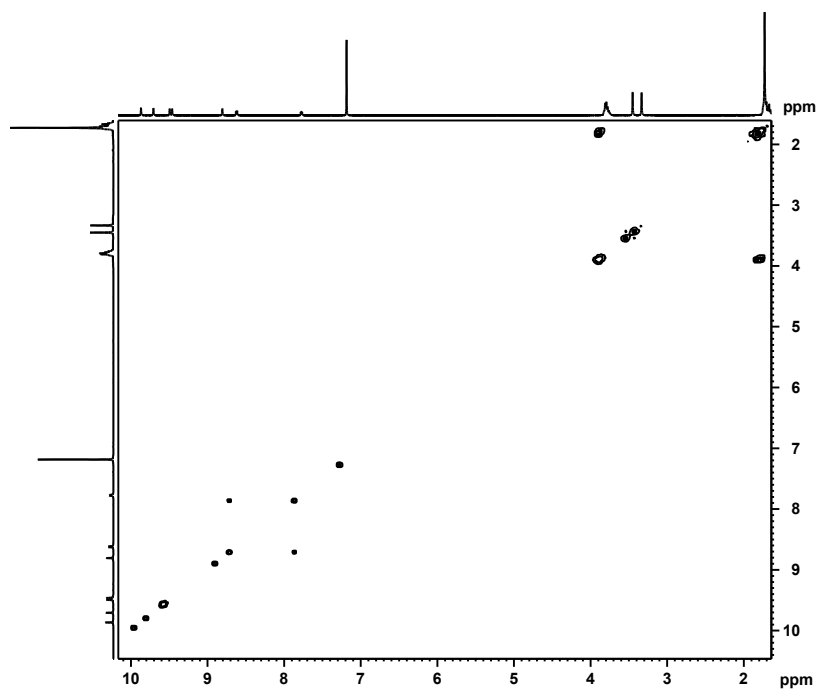

Figure S60. <sup>1</sup>H-<sup>1</sup>H COSY NMR spectrum of silver(III) *tert*-butylbenzocarbaporphyrin **21a** in CDCl<sub>3</sub>.

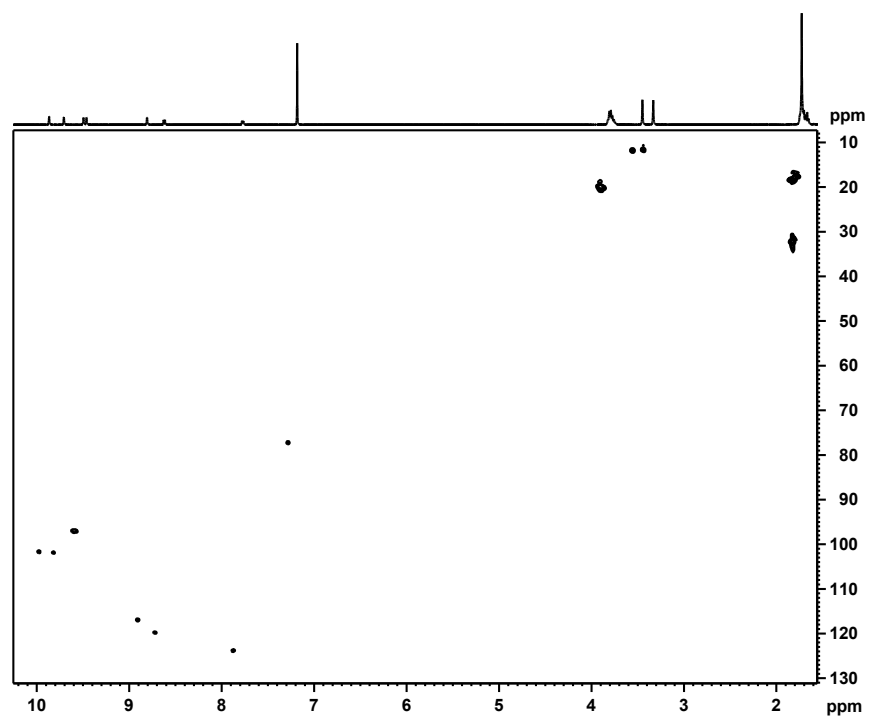

Figure S61. HSQC NMR spectrum of silver(III) *tert*-butylbenzocarbaporphyrin **21a** in CDCl<sub>3</sub>.

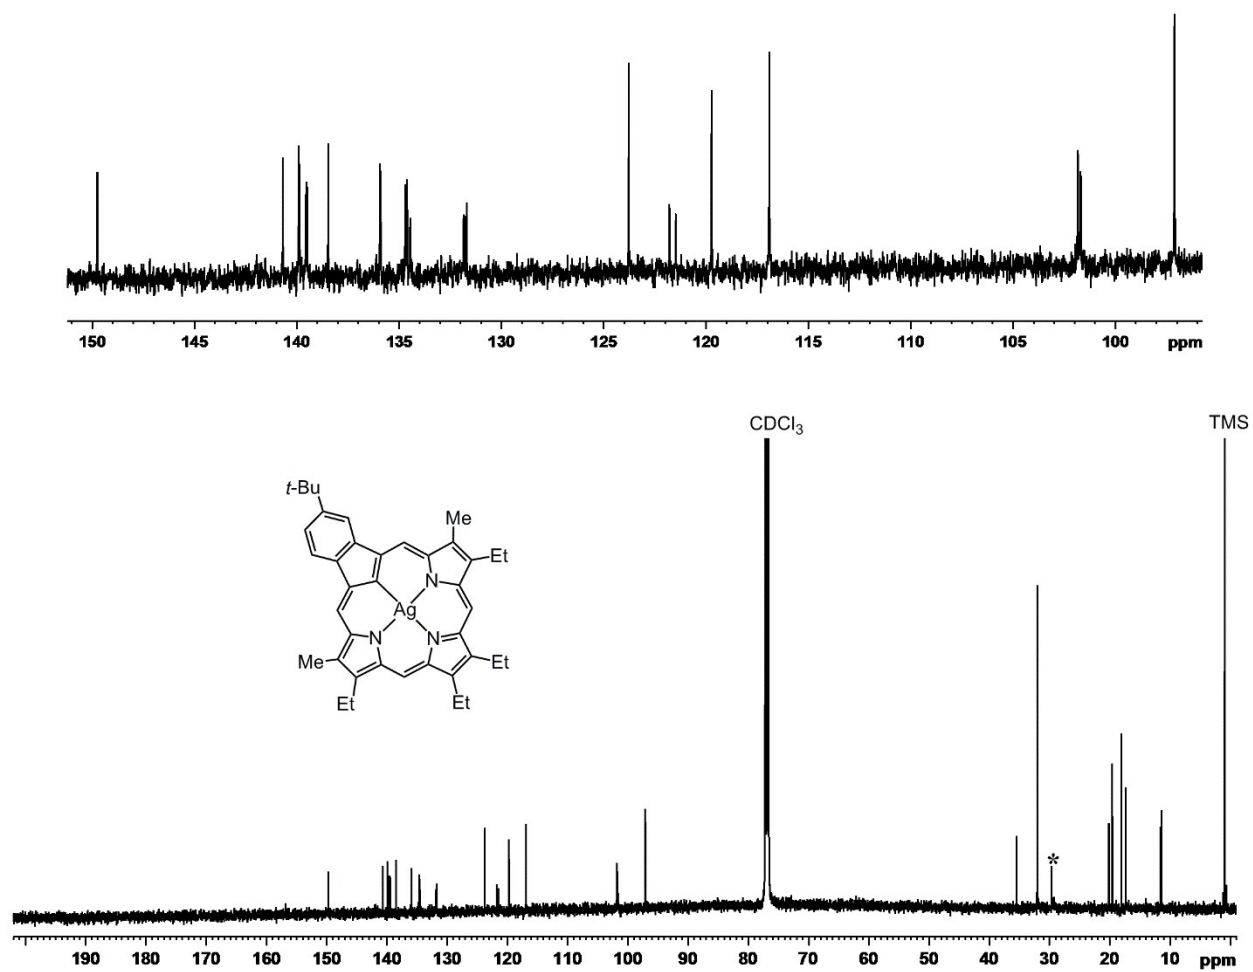

Figure S62. 125 MHz carbon-13 NMR spectrum of silver(III) *tert*-butylbenzocarbaporphyrin **21a** in CDCl<sub>3</sub>.



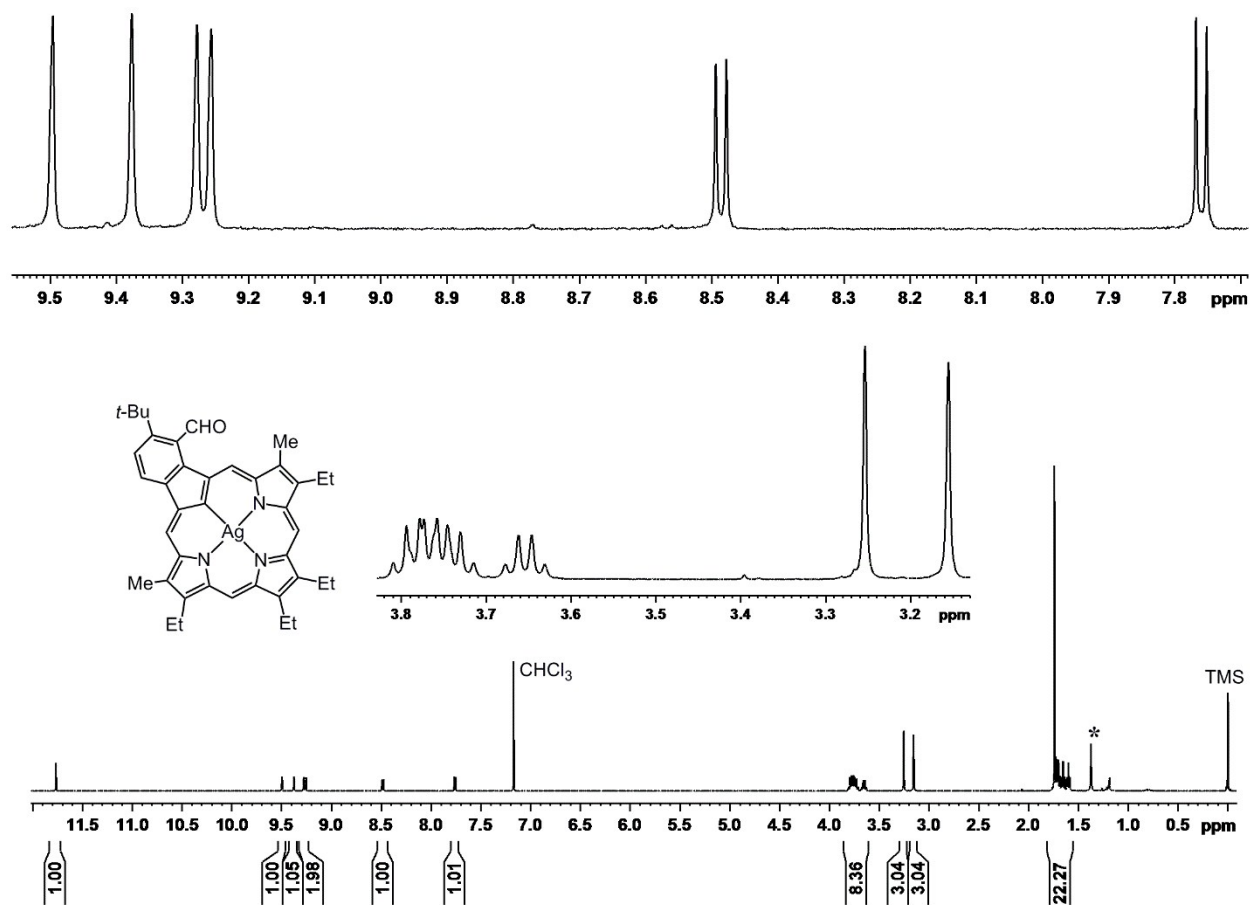

Figure S63. 500 MHz proton NMR spectrum of silver(III) *tert*-butylbenzocarbaporphyrin carbaldehyde **21b** in CDCl<sub>3</sub>.

\* solvent impurity

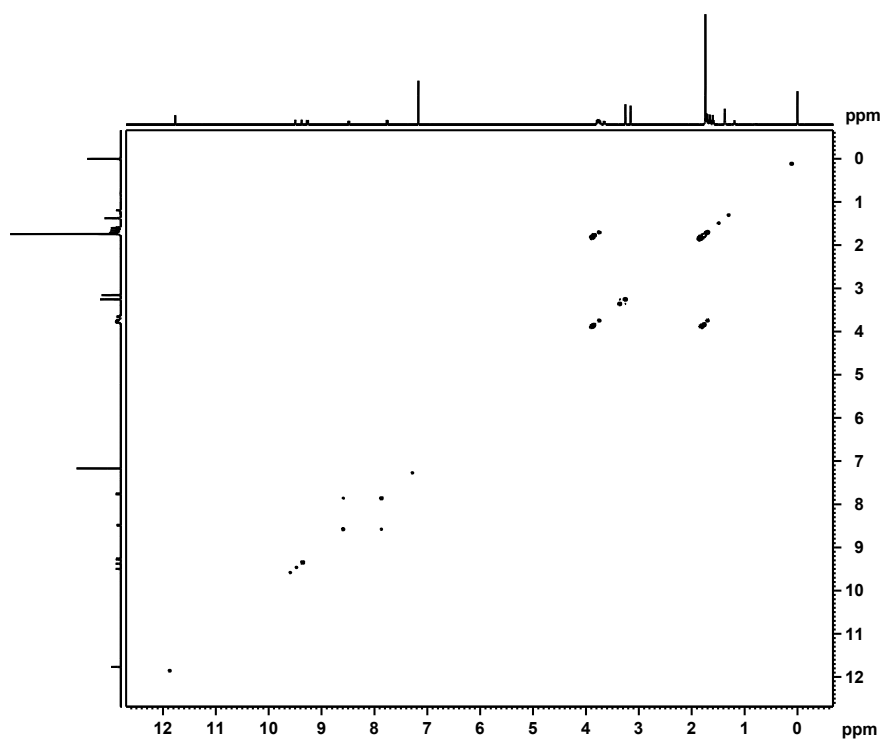

Figure S64. <sup>1</sup>H-<sup>1</sup>H COSY NMR spectrum of **21b** in CDCl<sub>3</sub>.

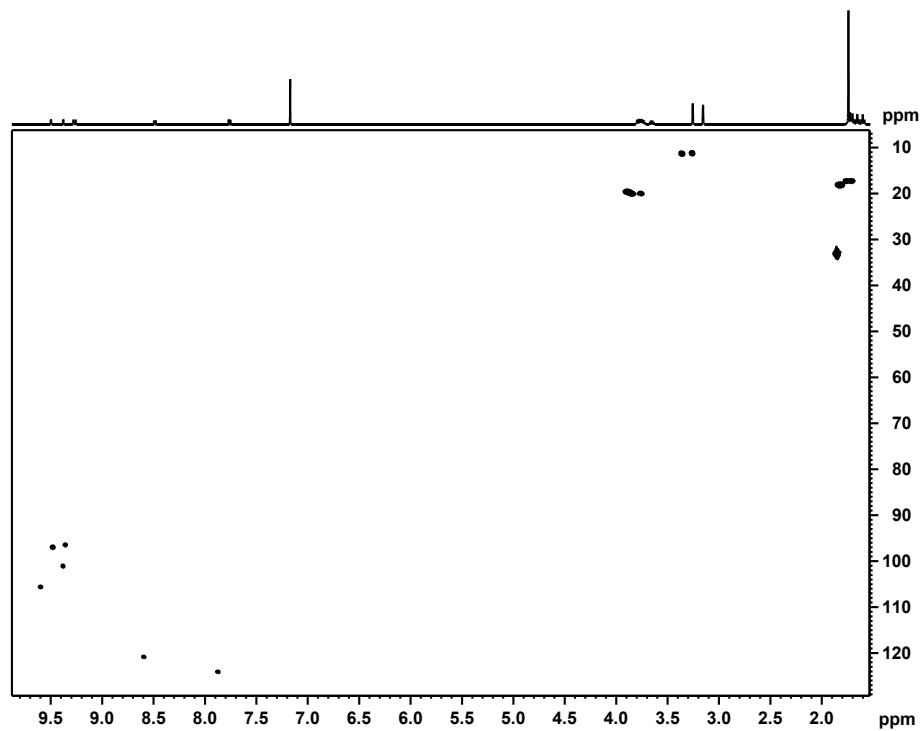

Figure S65. HSQC NMR spectrum of **21b** in CDCl<sub>3</sub>.

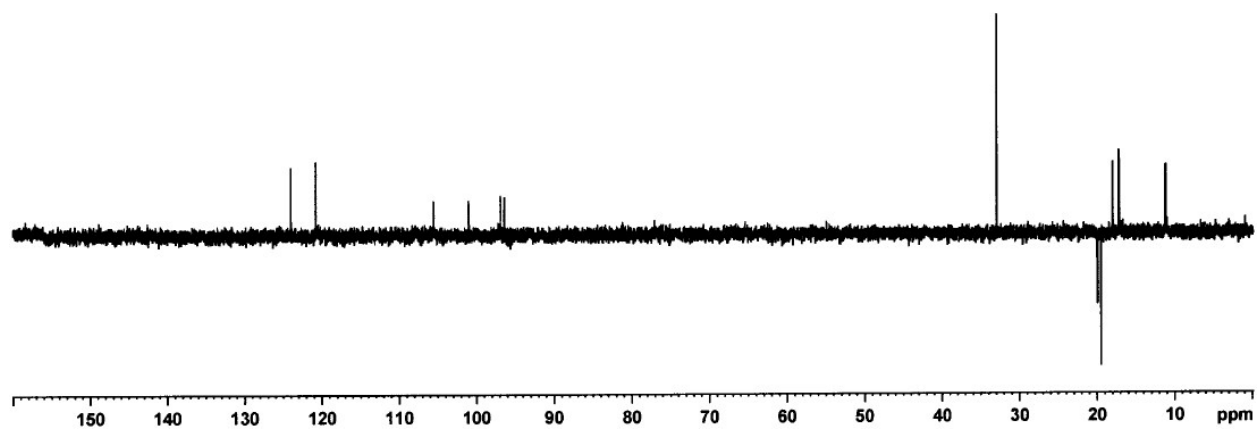

Figure S66. DEPT-135 NMR spectrum of **21b** in  $\text{CDCl}_3$ .

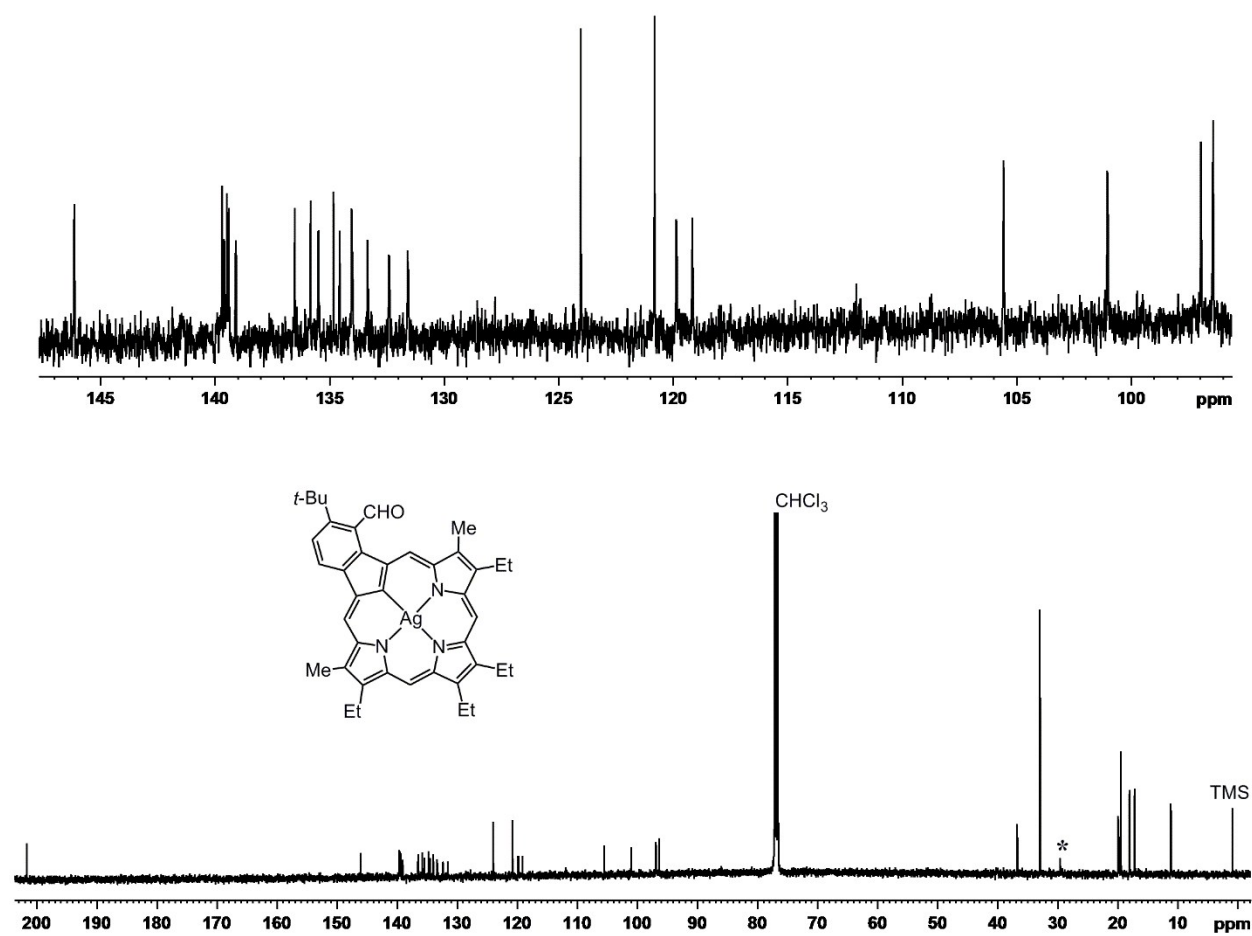

Figure S67. 125 MHz carbon-13 NMR spectrum of silver(III) *tert*-butylbenzocarbaporphyrin carbaldehyde **21b** in  $\text{CDCl}_3$ .

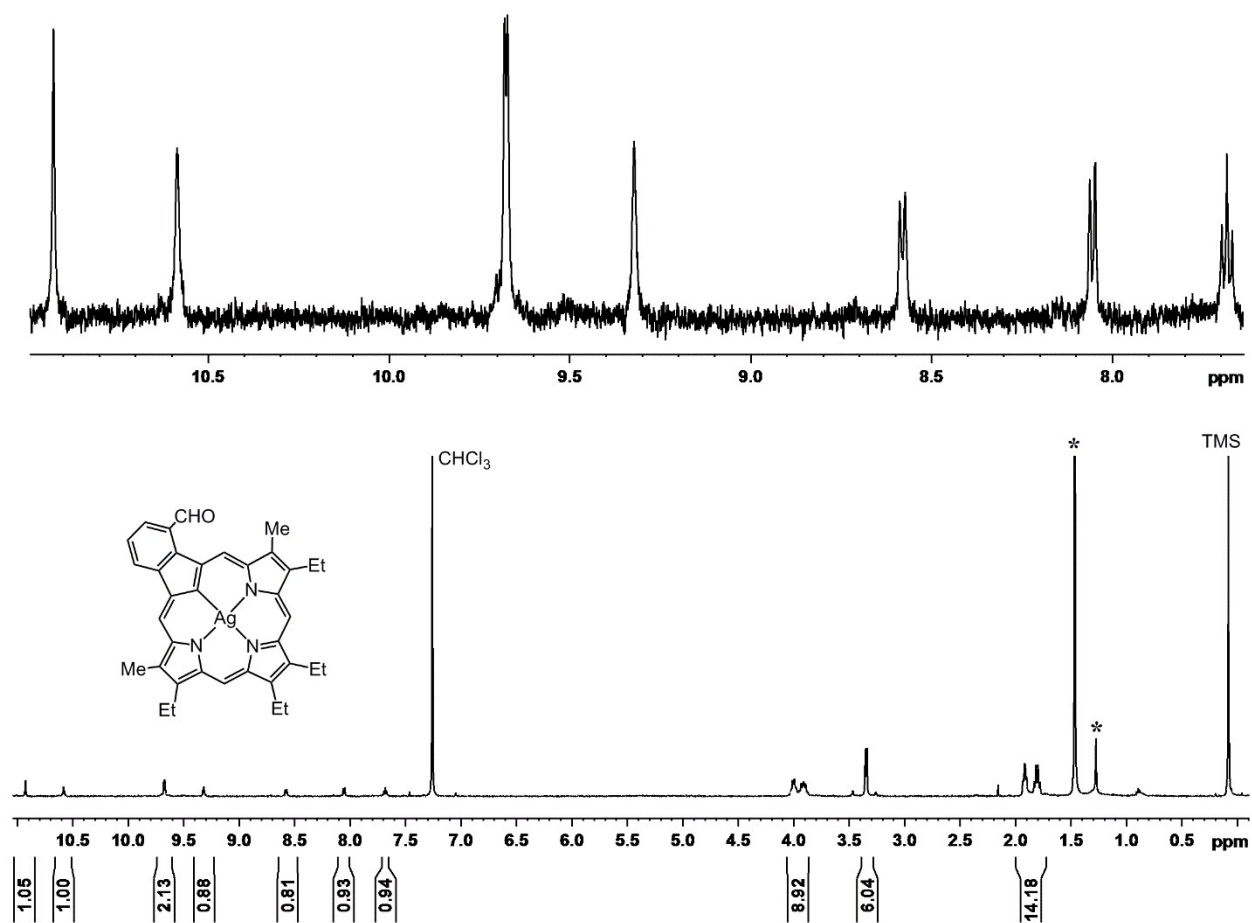

Figure S68. 500 MHz proton NMR spectrum of silver(III) benzocarporphyrin carbaldehyde **22c** in  $\text{CDCl}_3$  at 50 °C. This sample was highly insoluble in organic solvents.

\* solvent impurities

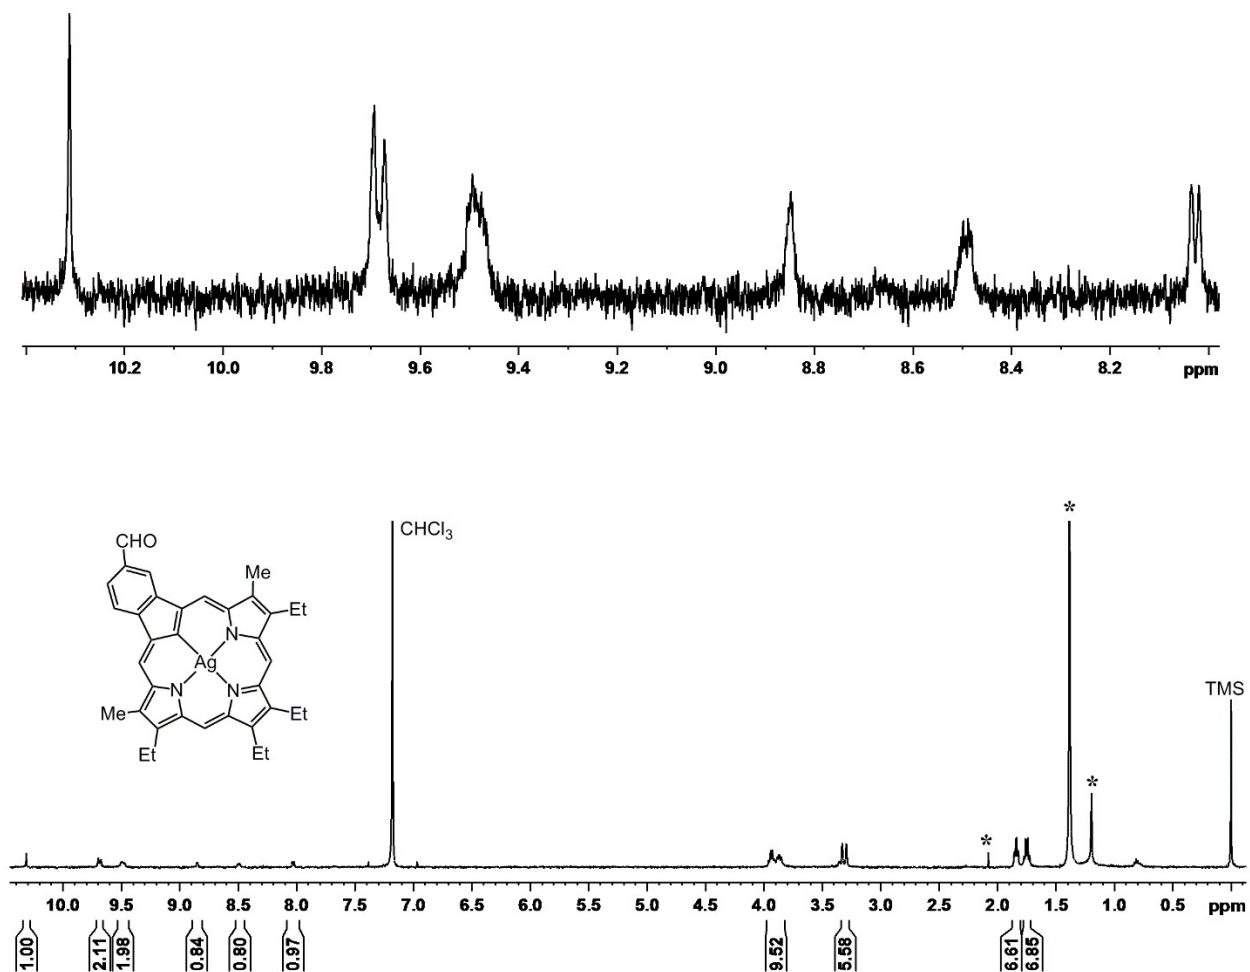

Figure S69. 500 MHz proton NMR spectrum of silver(III) benzocarbaporphyrin carbaldehyde **22b** in CDCl<sub>3</sub> at 50 °C. This sample was highly insoluble in organic solvents.

\* solvent impurities

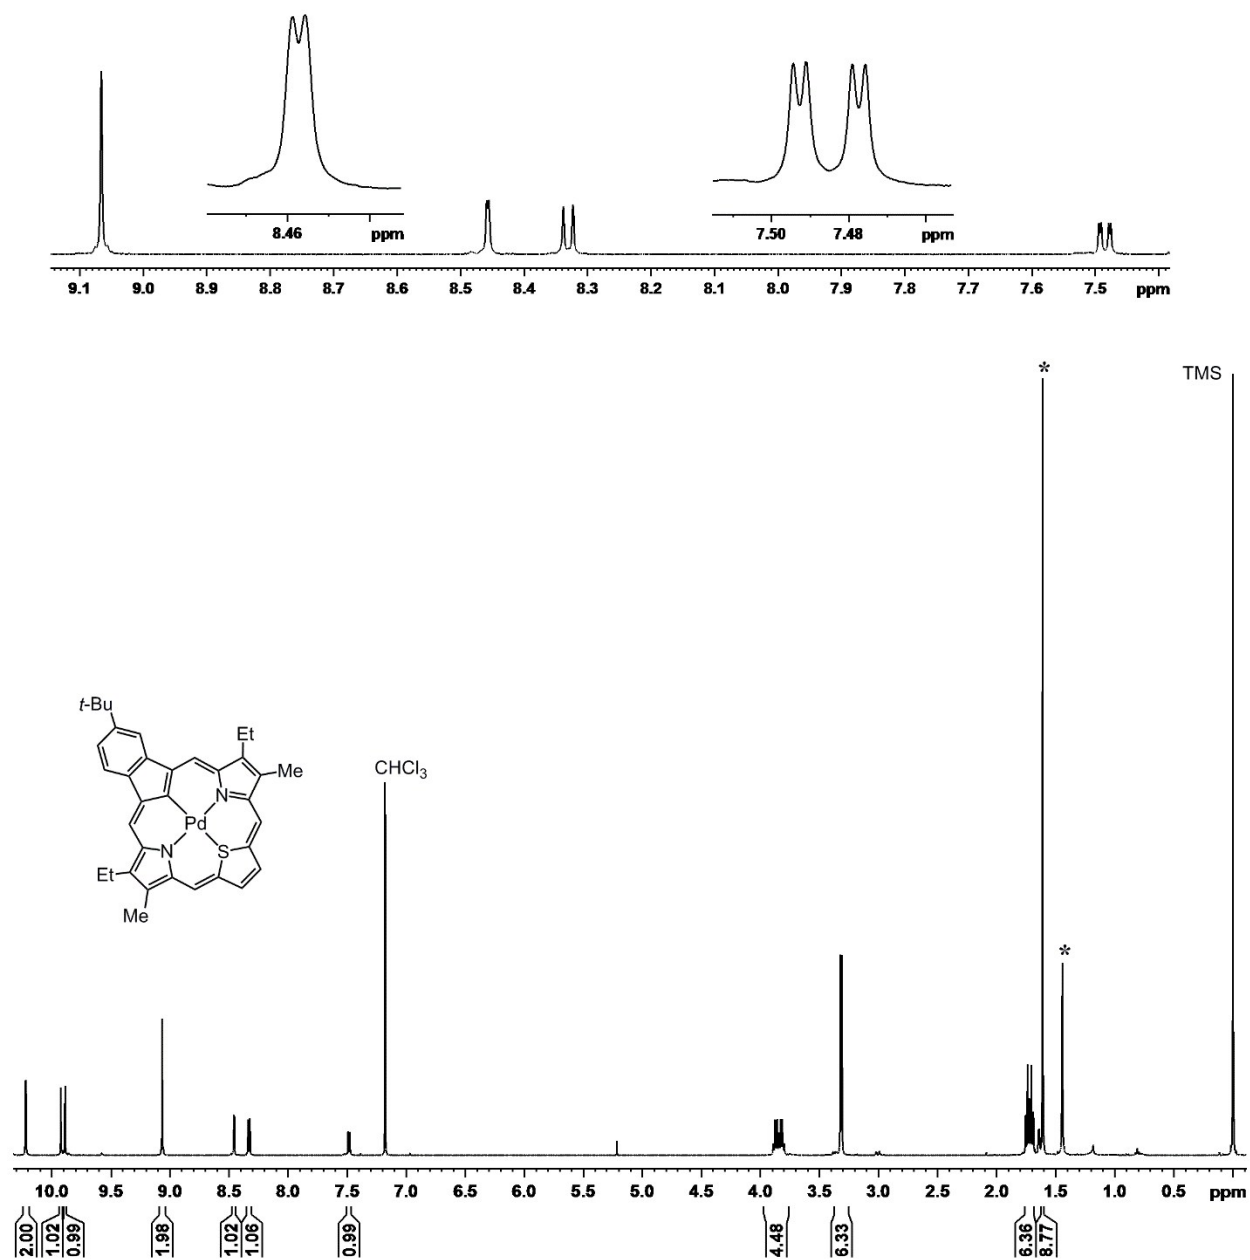

Figure S70. 500 MHz proton NMR spectrum of palladium(II) *tert*-butylbenzocarbaporphyrin **29a** in CDCl<sub>3</sub>.

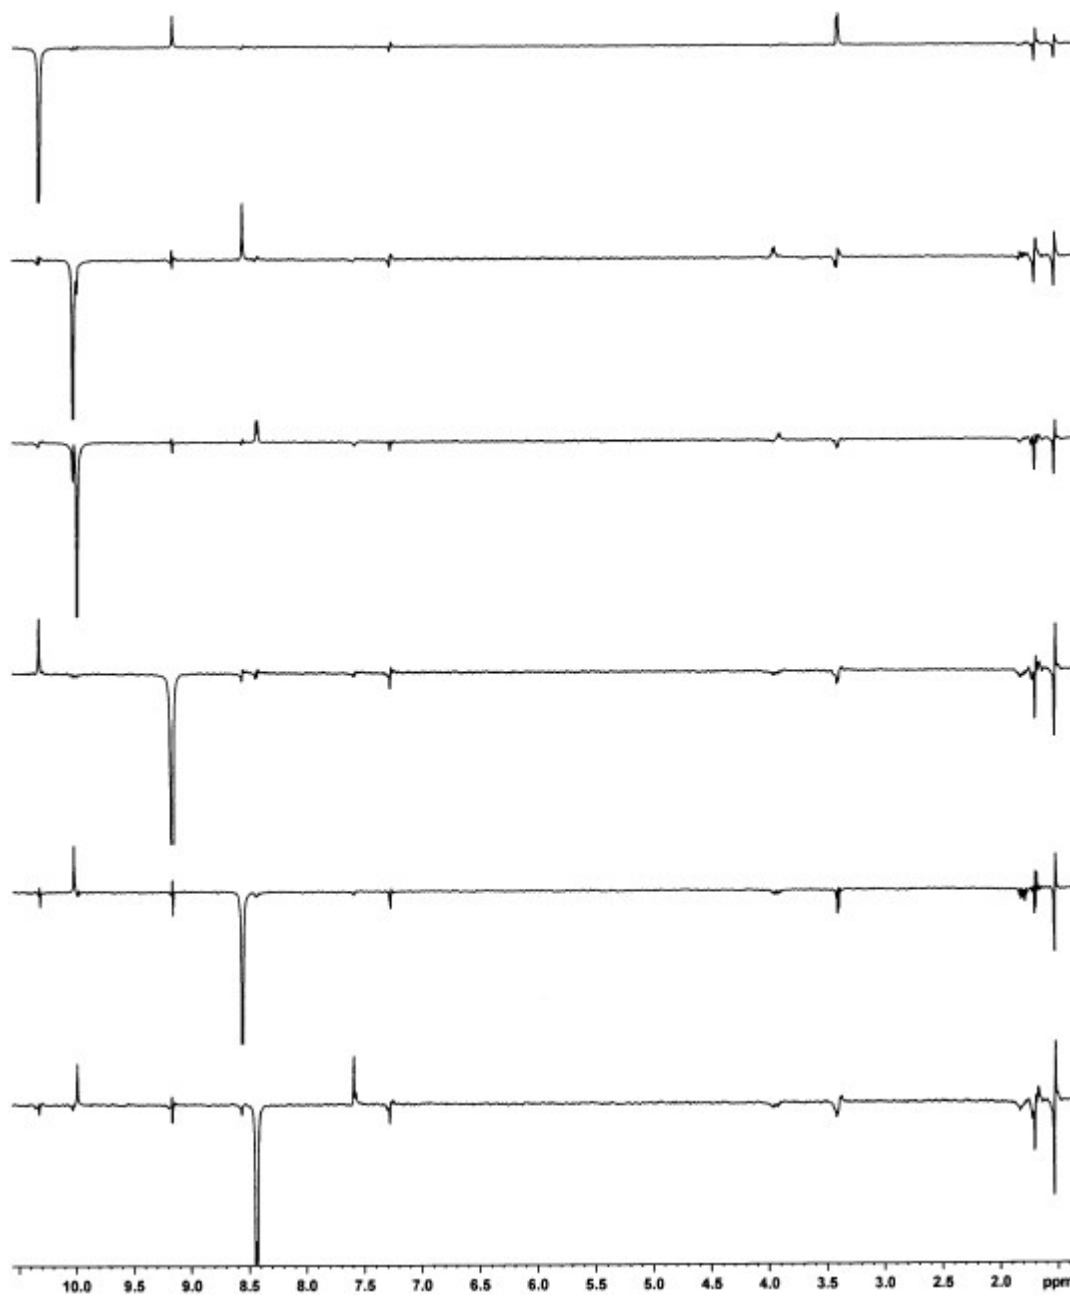

Figure S71. Selected nOe difference proton NMR spectra of palladium(II) *tert*-butylbenzocarbaporphyrin **29a** in CDCl<sub>3</sub>.

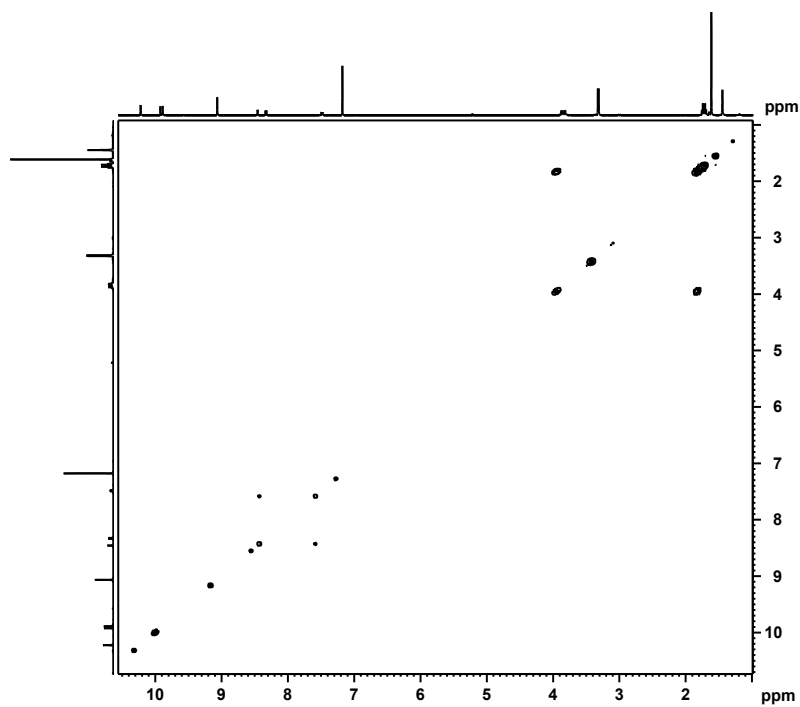

Figure S72. <sup>1</sup>H-<sup>1</sup>H COSY NMR spectrum of palladium(II) complex **29a** in CDCl<sub>3</sub>.

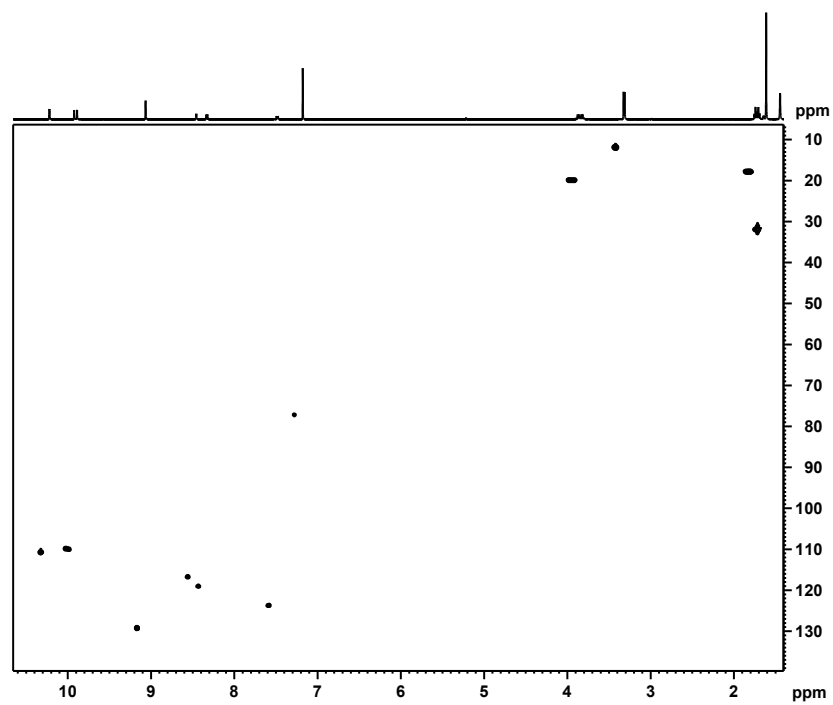

Figure S73. HSQC NMR spectrum of palladium(II) *tert*-butylbenzocarbaporphyrin **29a** in CDCl<sub>3</sub>.



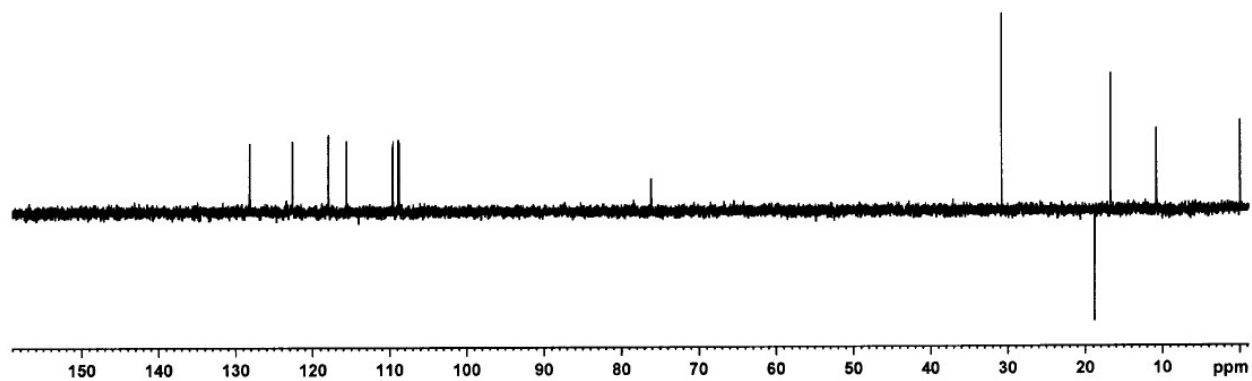

Figure S74. DEPT-135 NMR spectrum of **29a** in  $\text{CDCl}_3$ .

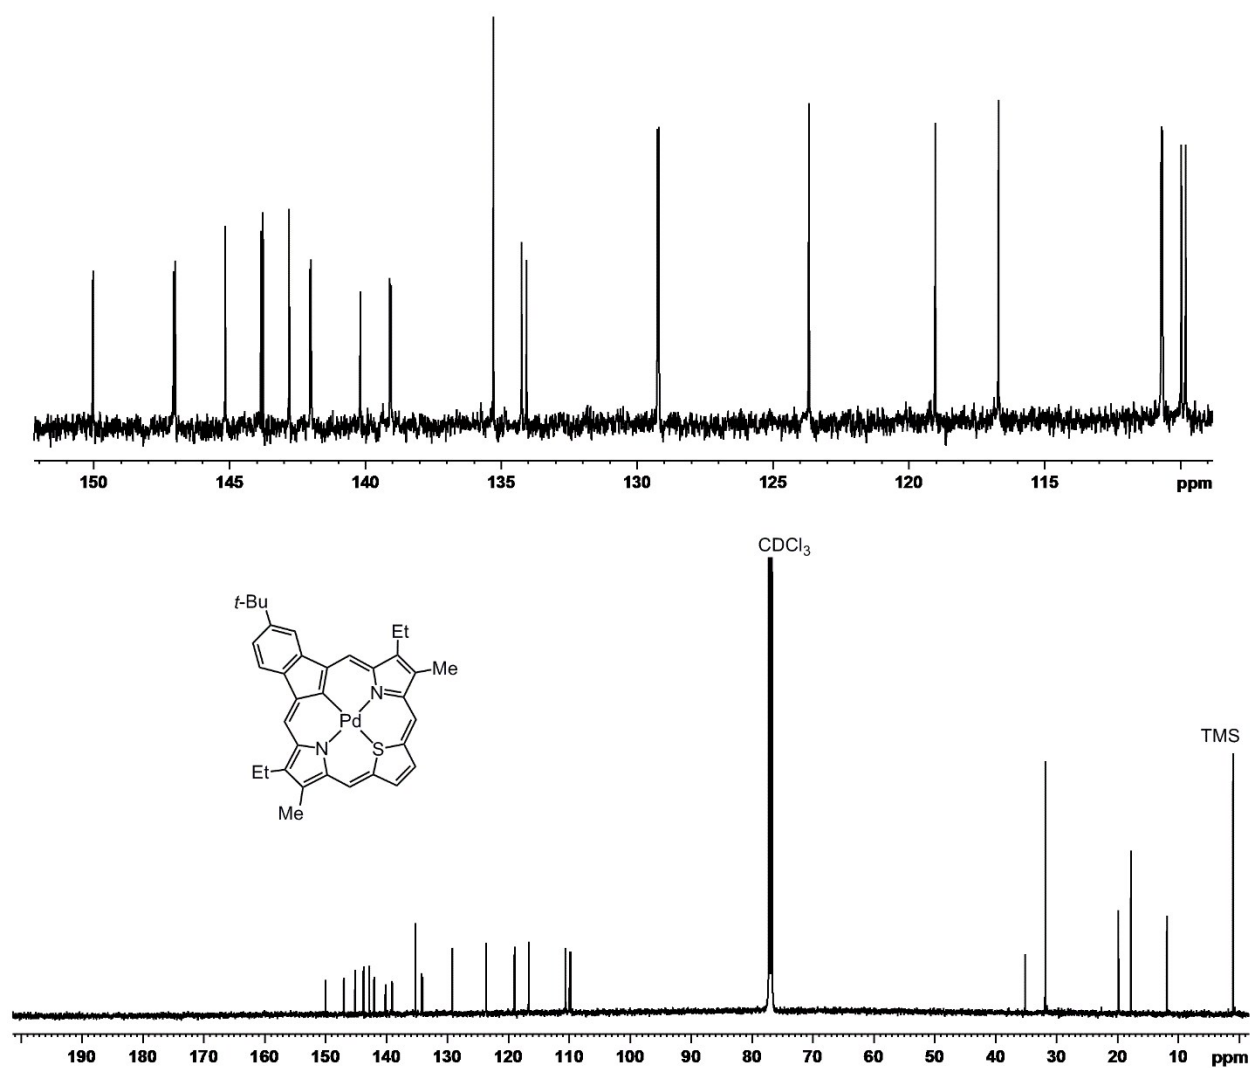

Figure S75. 125 MHz carbon-13 NMR spectrum of palladium(II) *tert*-butylbenzocarbophyrin **29a** in  $\text{CDCl}_3$ .

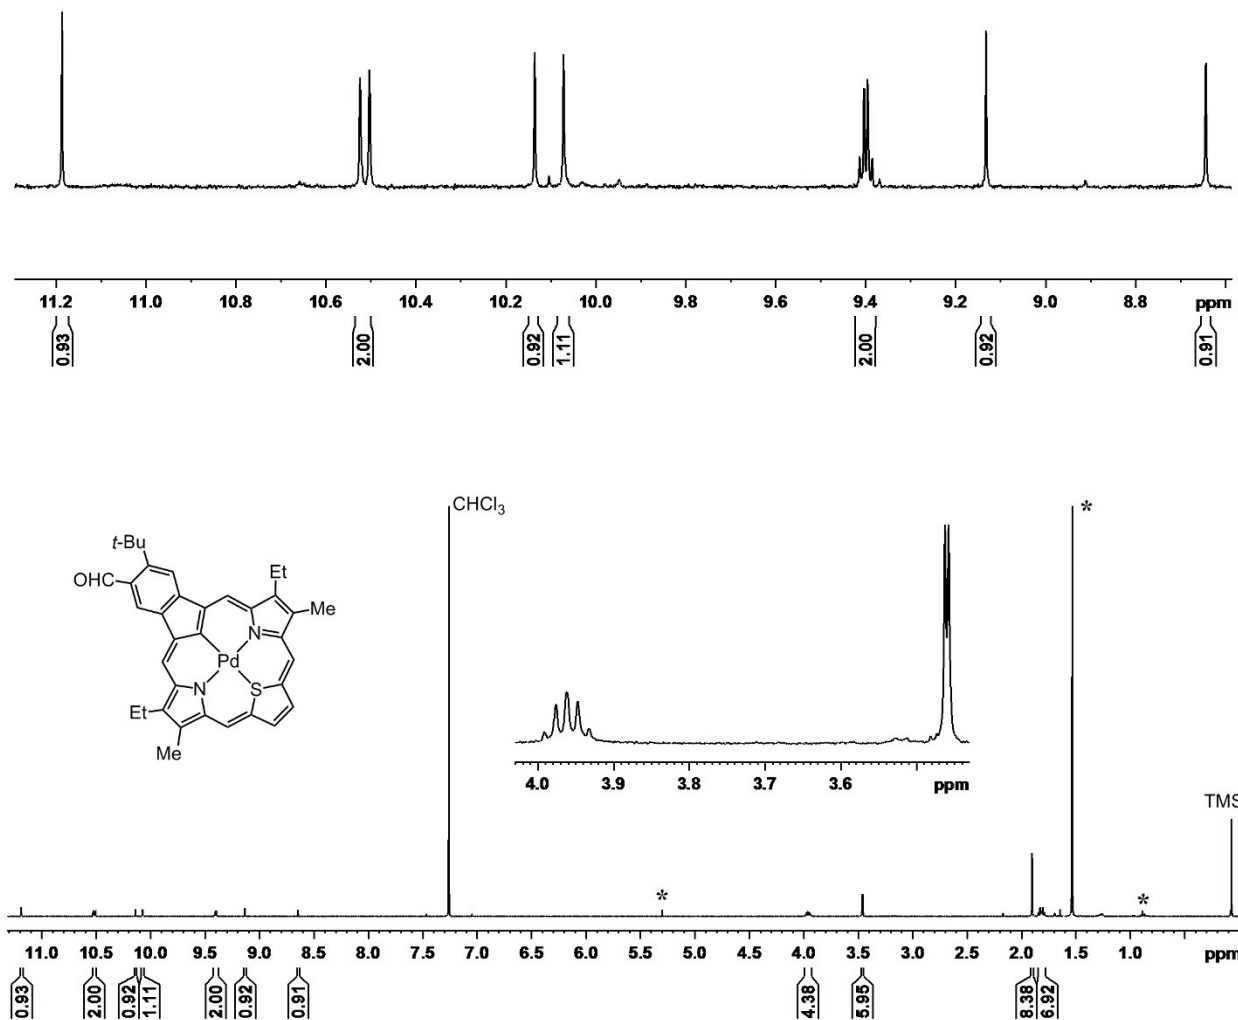

Figure S76. 500 MHz proton NMR spectrum of palladium(II) *tert*-butylbenzocarbaporphyrin carbaldehyde **29b** in CDCl<sub>3</sub>.

\* solvent impurities

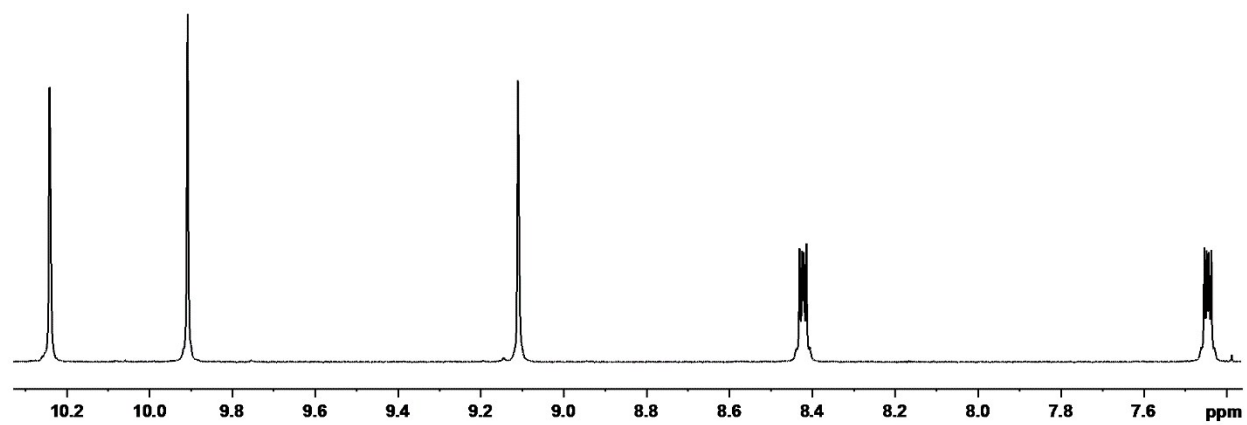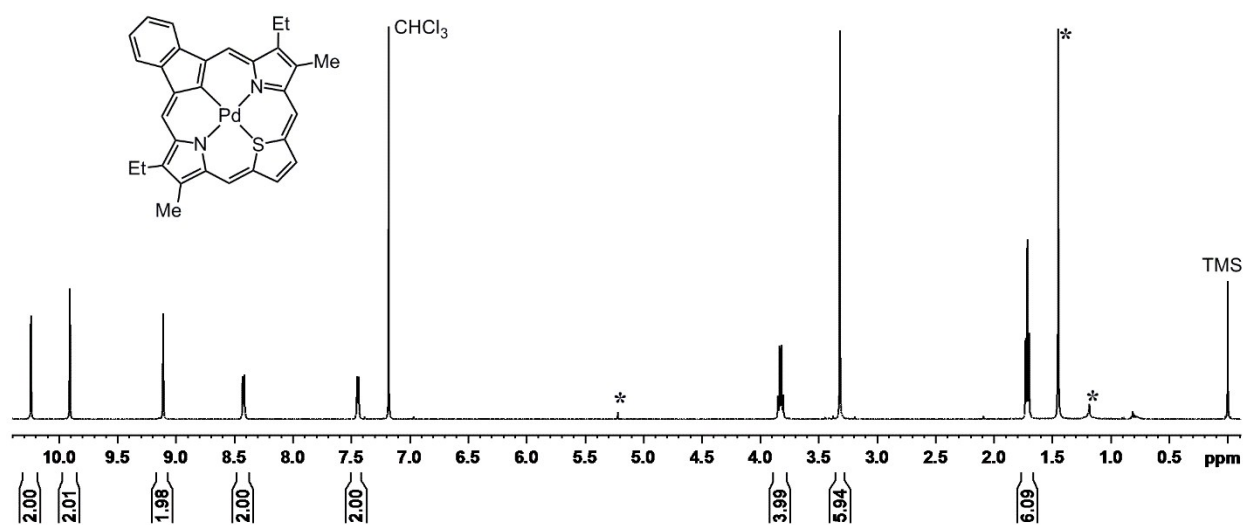

Figure S77. 500 MHz proton NMR spectrum of palladium(II) benzothiocarbaporphyrin **29c** in  $\text{CDCl}_3$ .

\* solvent impurities

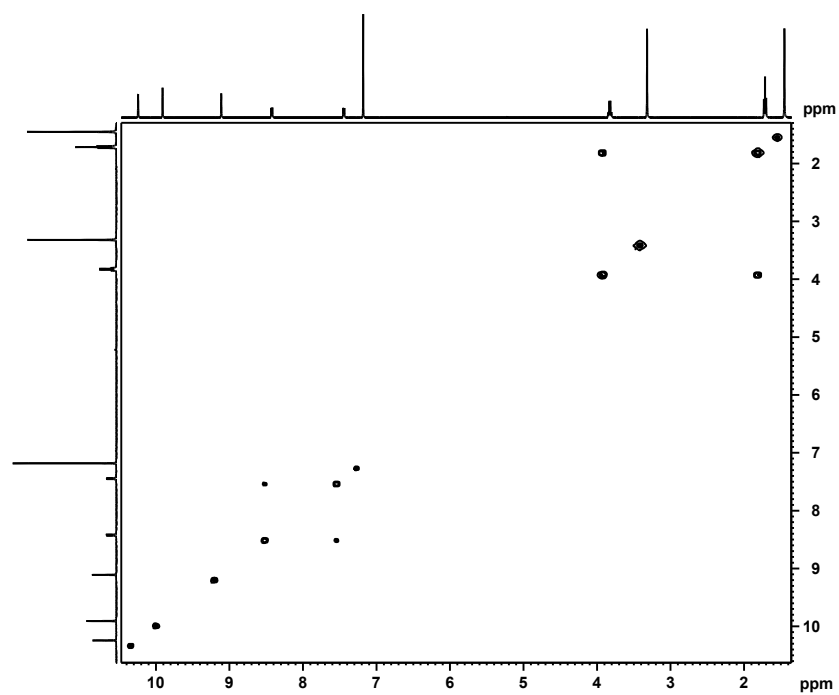

Figure S78.  $^1\text{H}$ - $^1\text{H}$  COSY NMR spectrum of **29c** in  $\text{CDCl}_3$ .

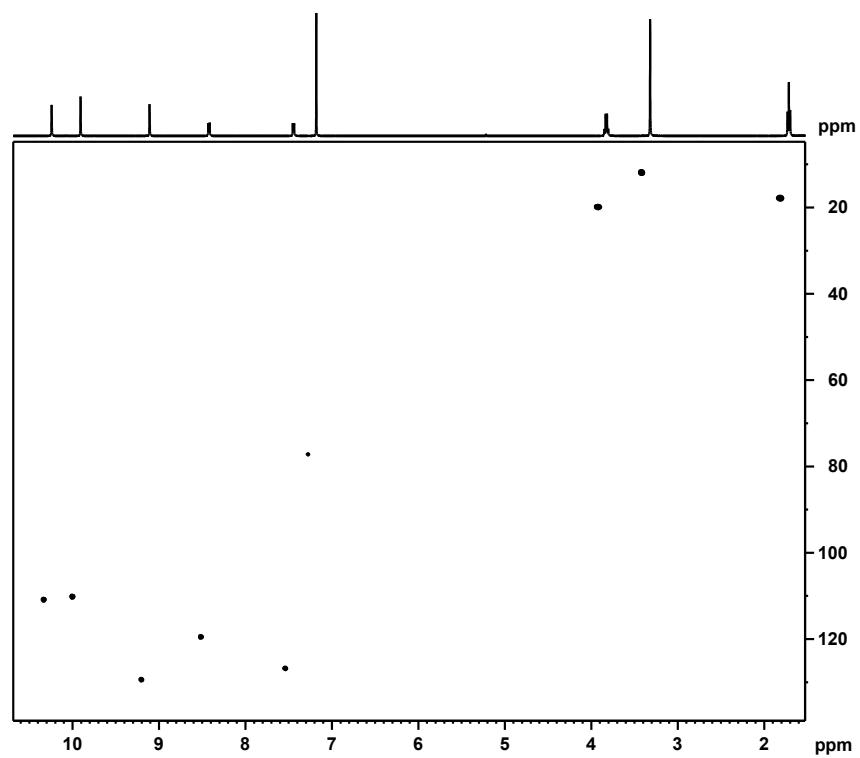

Figure S79. HSQC NMR spectrum of **29c** in  $\text{CDCl}_3$ .

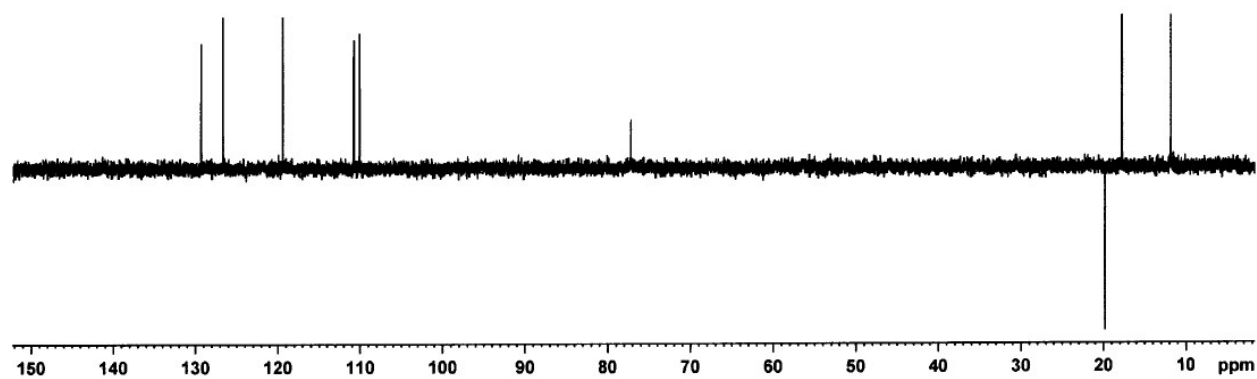

Figure S80. DEPT-135 NMR spectrum of **29c** in  $\text{CDCl}_3$ .

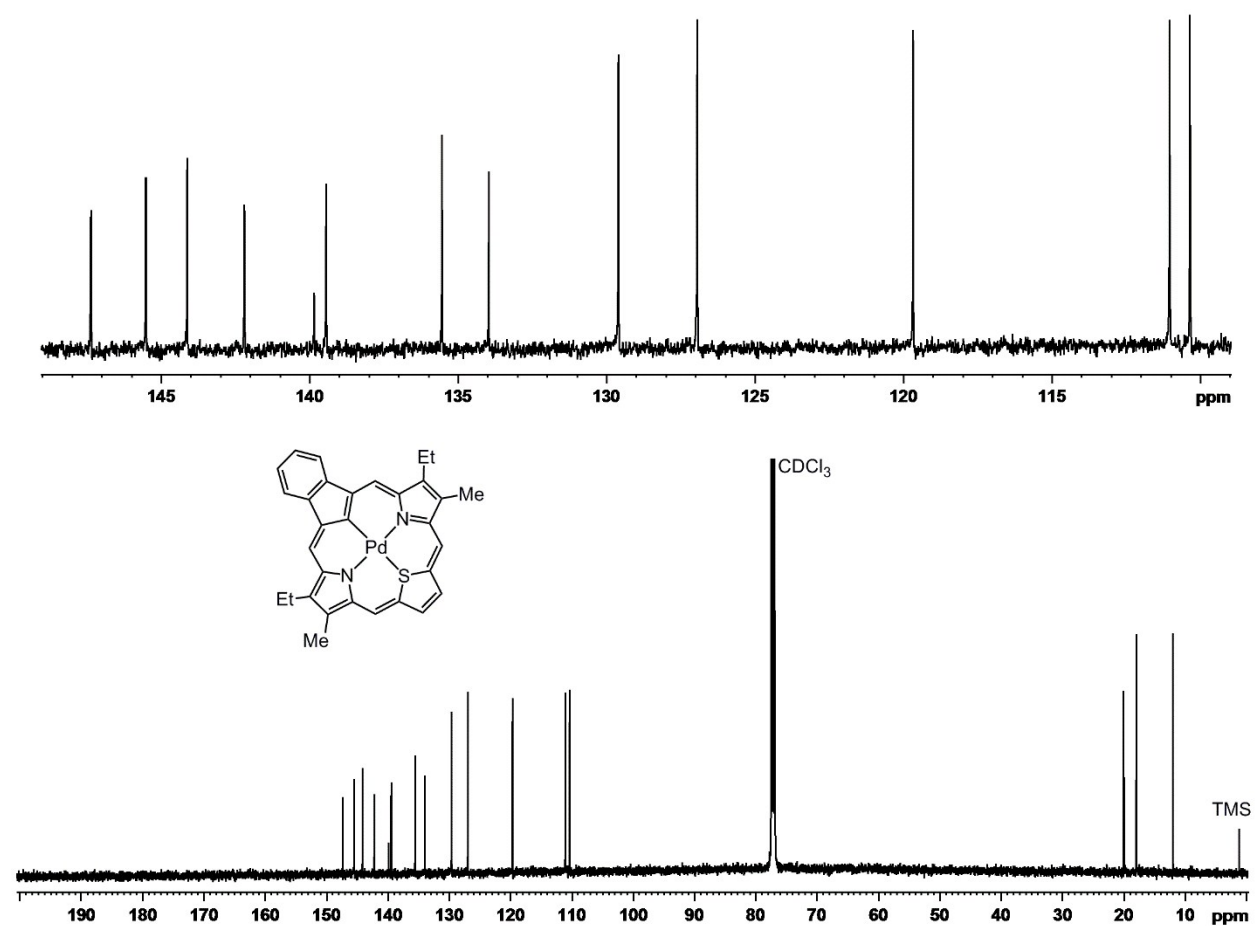

Figure S81. 125 MHz carbon-13 NMR spectrum of palladium(II) benzothiacarbaporphyrin **29c** in  $\text{CDCl}_3$ .

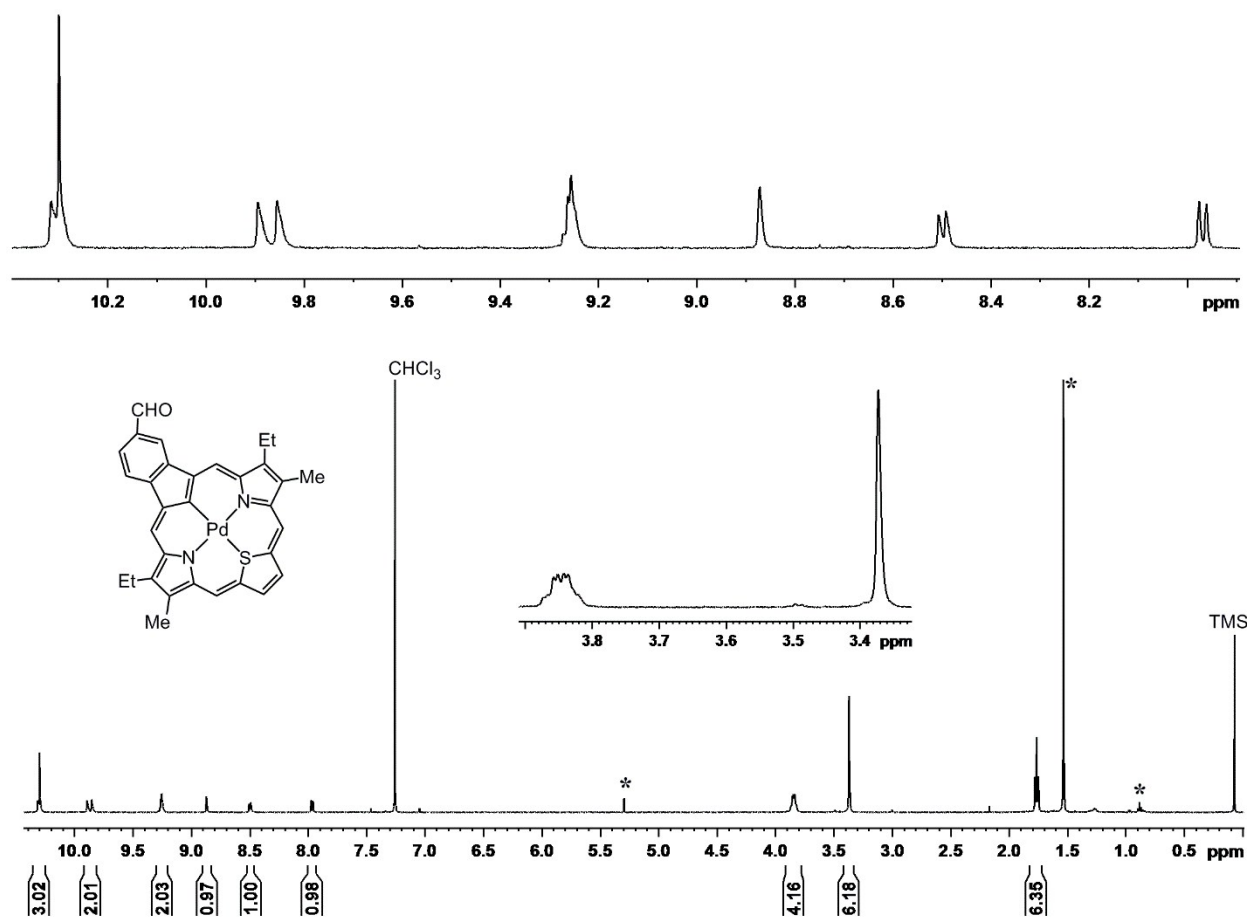

Figure S82. 500 MHz proton NMR spectrum of palladium(II) benzothiacarporphyrin **29d** in CDCl<sub>3</sub>.

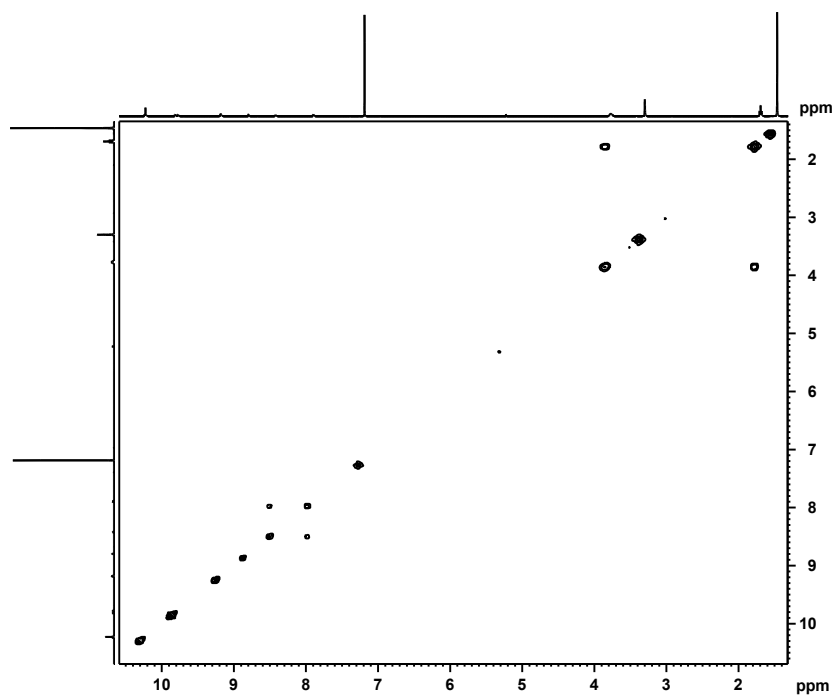

Figure S83. <sup>1</sup>H-<sup>1</sup>H COSY NMR spectrum of palladium(II) benzothiacarbaporphyrin **29d** in CDCl<sub>3</sub>.

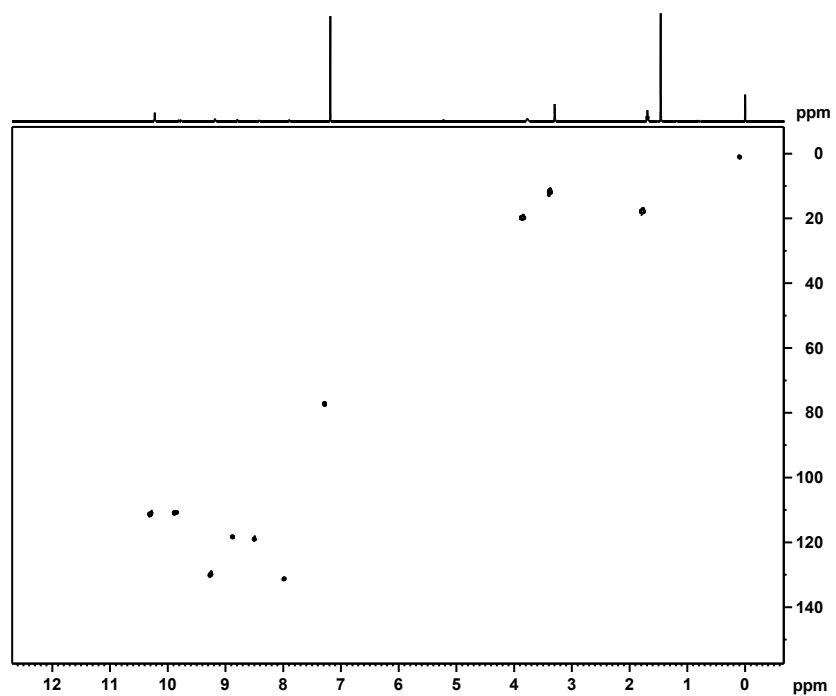

Figure S84. HSQC NMR spectrum of palladium(II) benzothiacarbaporphyrin **29d** in CDCl<sub>3</sub>.

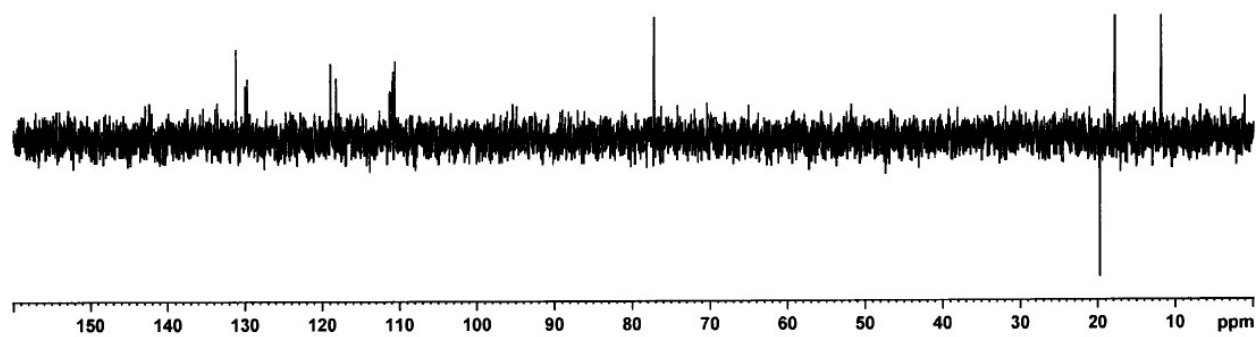

Figure S85. DEPT-135 NMR spectrum of palladium(II) benzothiacarbaporphyrin **29d** in CDCl<sub>3</sub>.

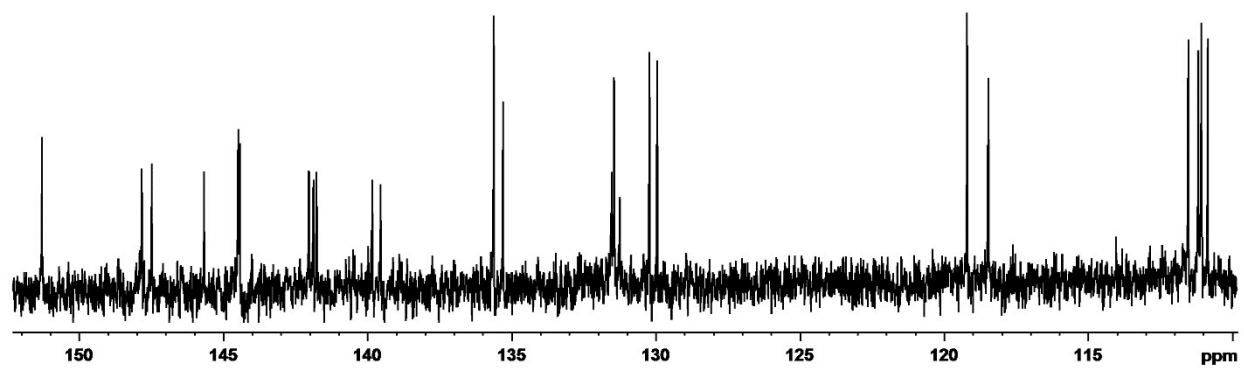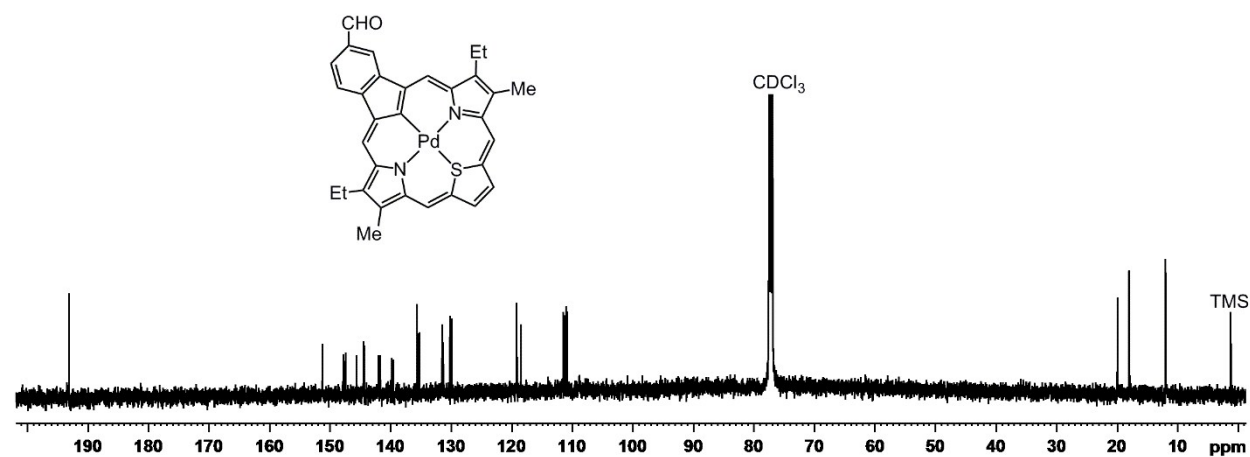

Figure S86. 125 MHz carbon-13 NMR spectrum of palladium(II) benzothiacarbaporphyrin **29d** in CDCl<sub>3</sub>.



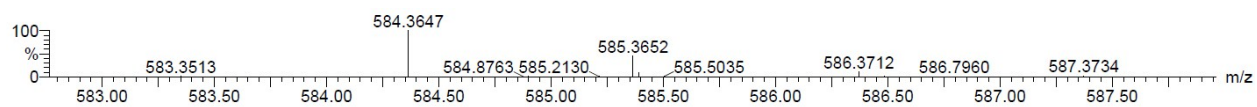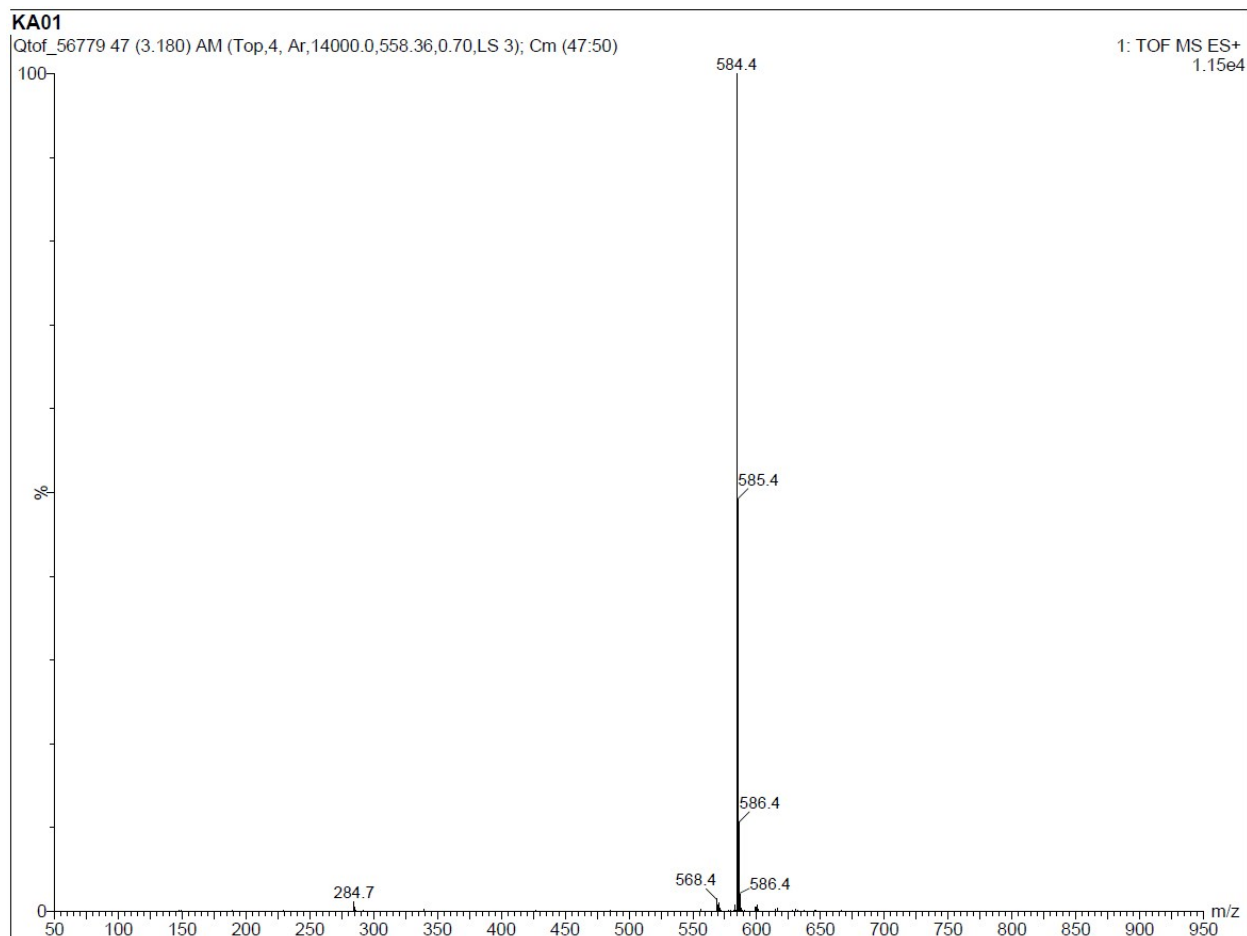

Figure S87. ESI MS of *tert*-butyl 21-oxyazuliporphyrin **16a**.

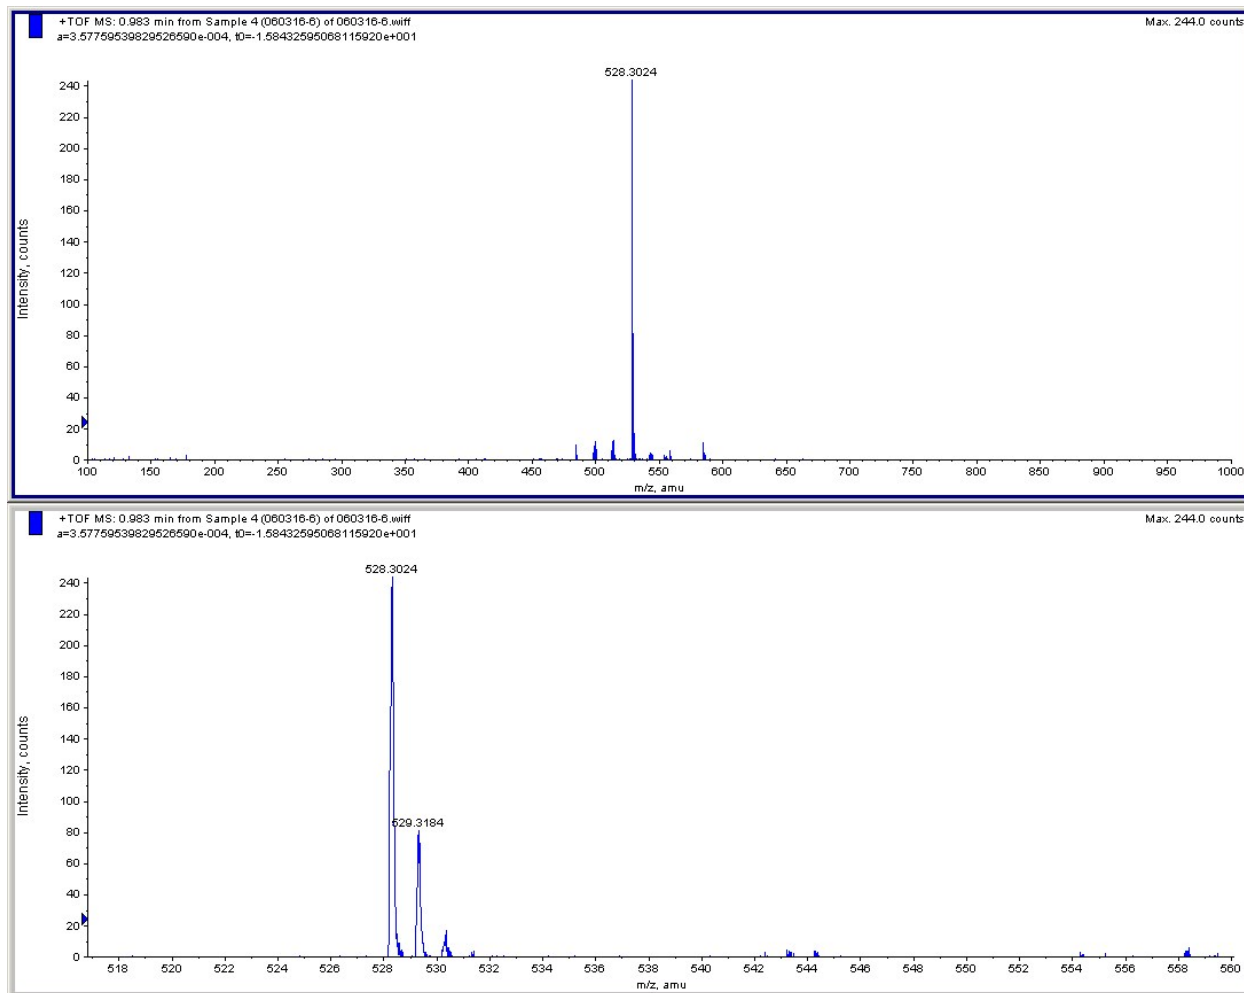

Figure S88. ESI MS of oxyazuliporphyrin **16b**.

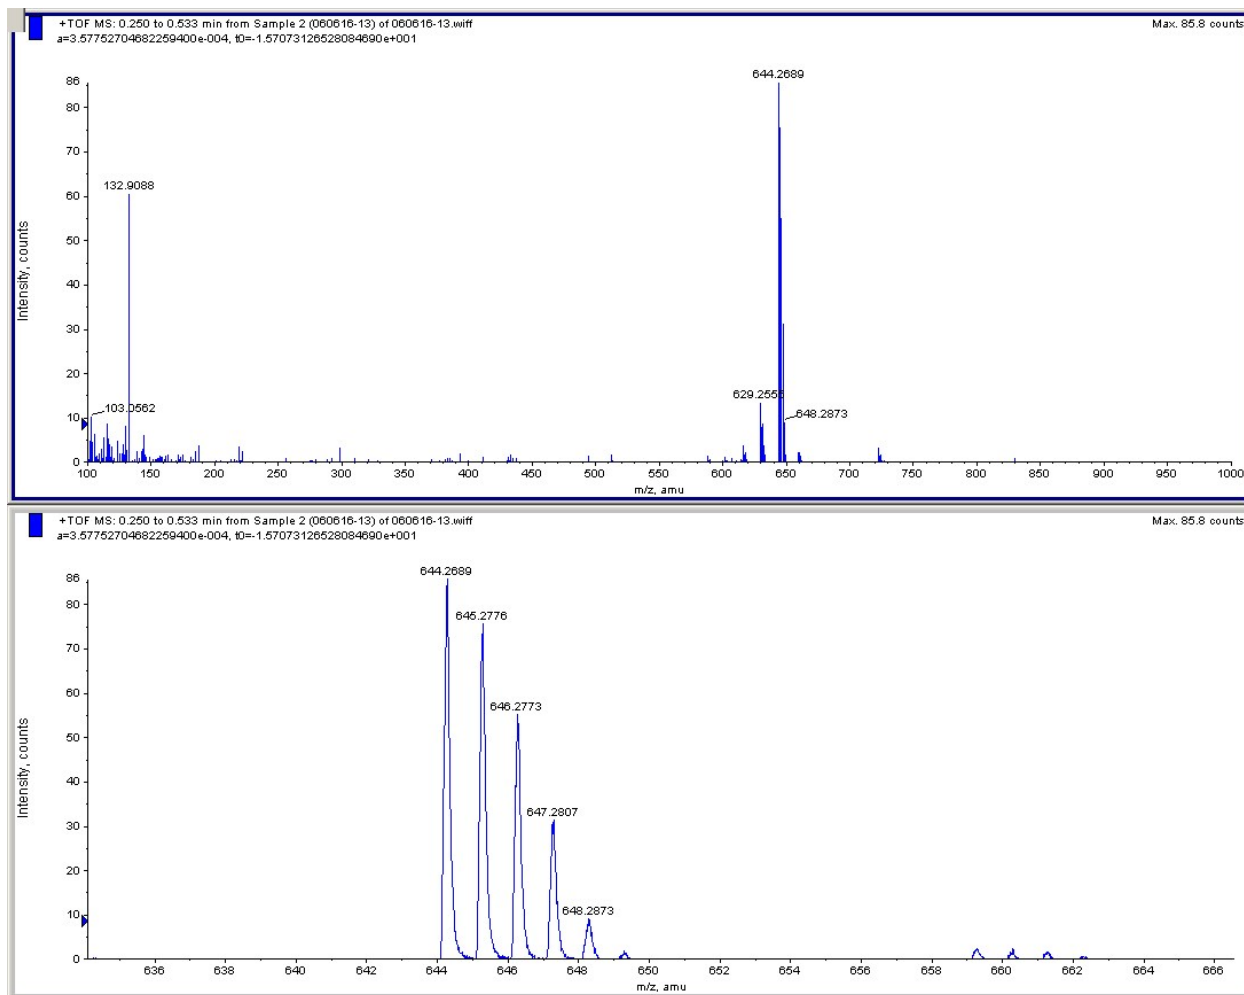

Figure S89. ESI MS of copper(II) complex **17a**.

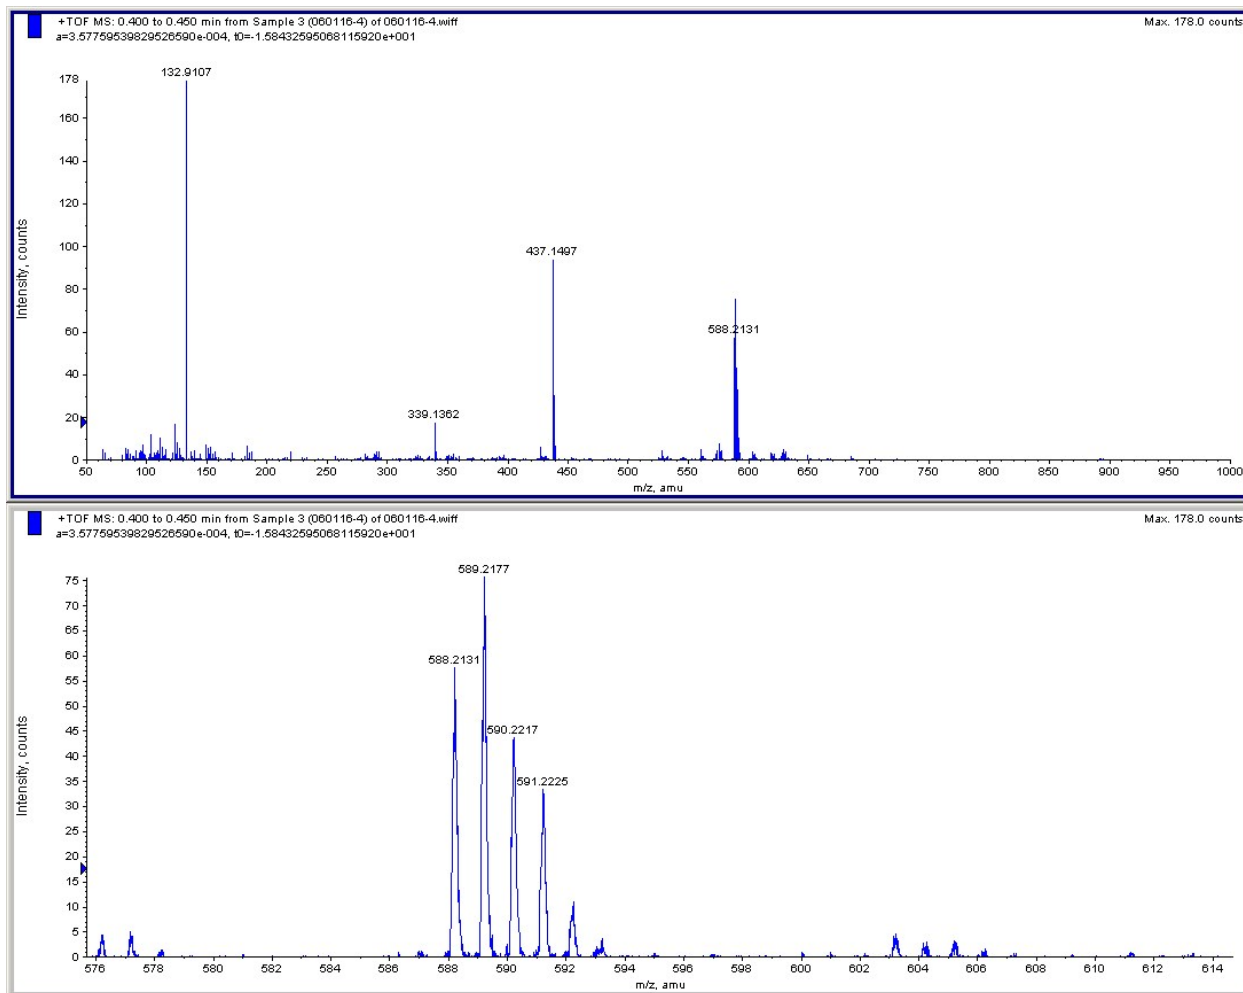Scheme S90.ESI MS of copper(II) complex **17b**.

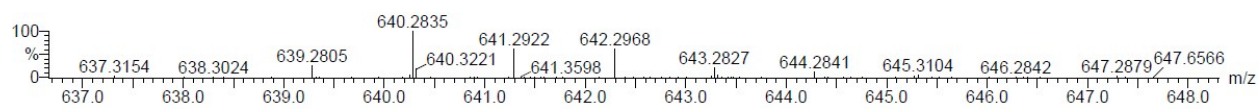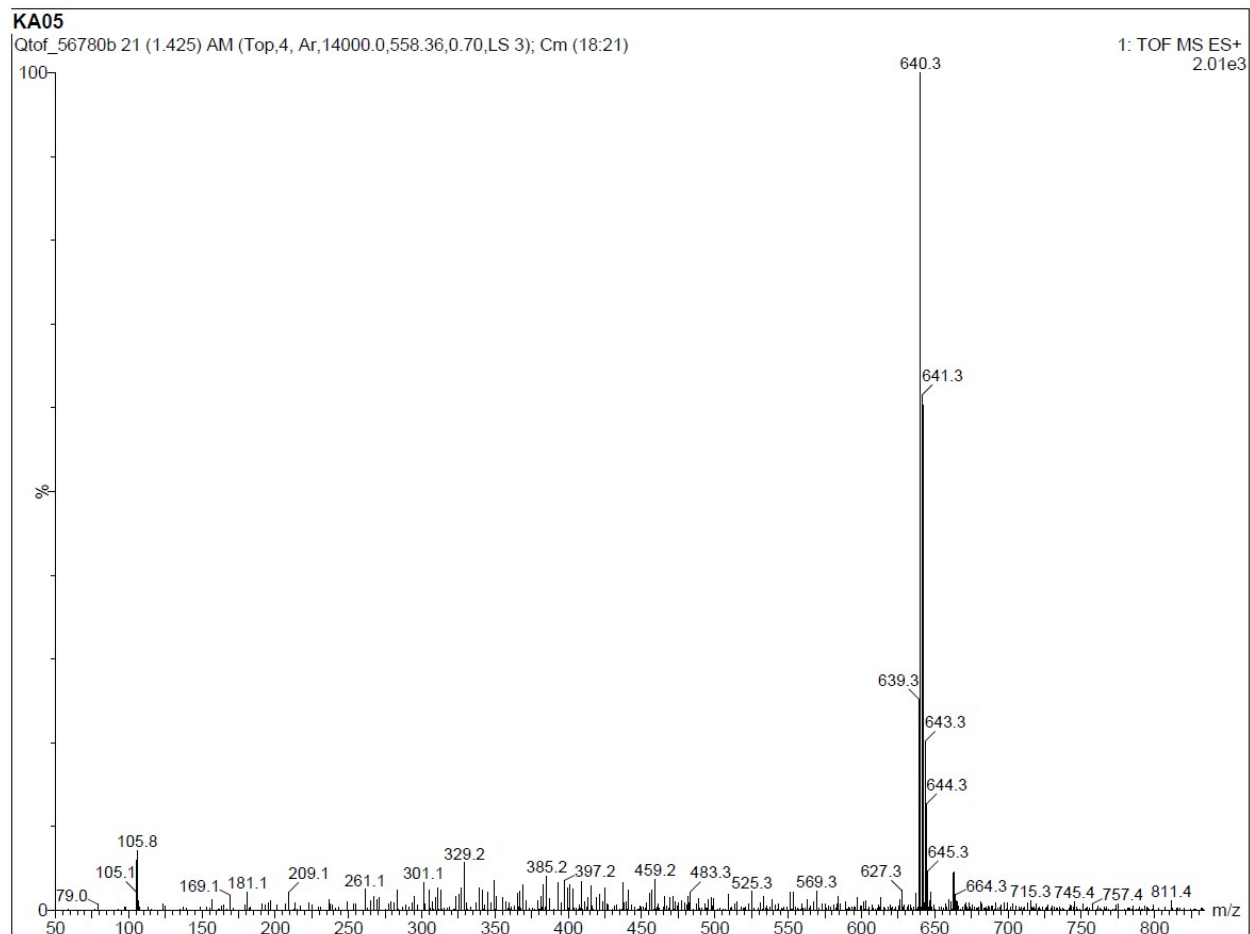

Scheme S91.ESI MS of nickel(II) complex **18a**.

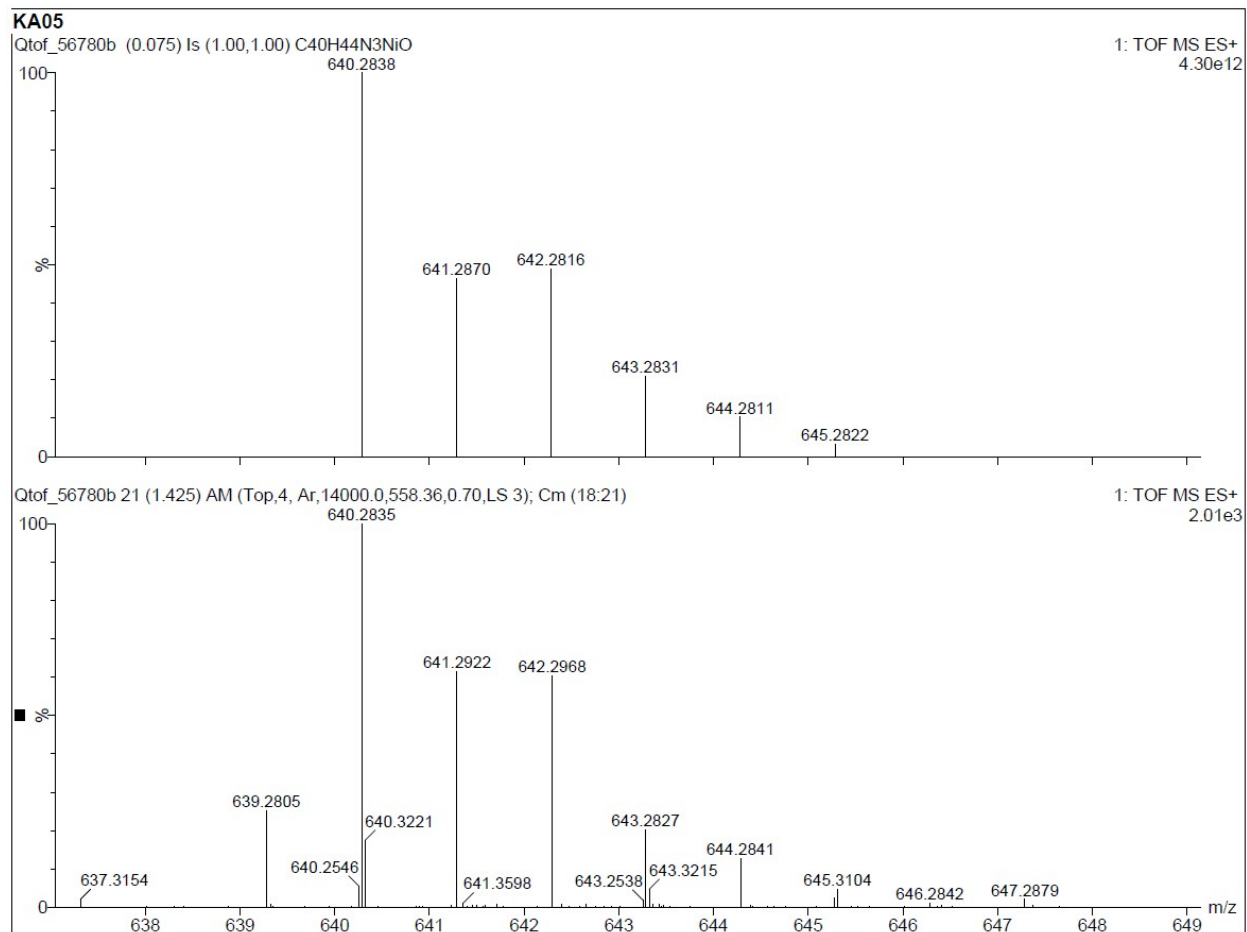

Figure S92. Analysis of the isotope peaks for the previous nickel complex.

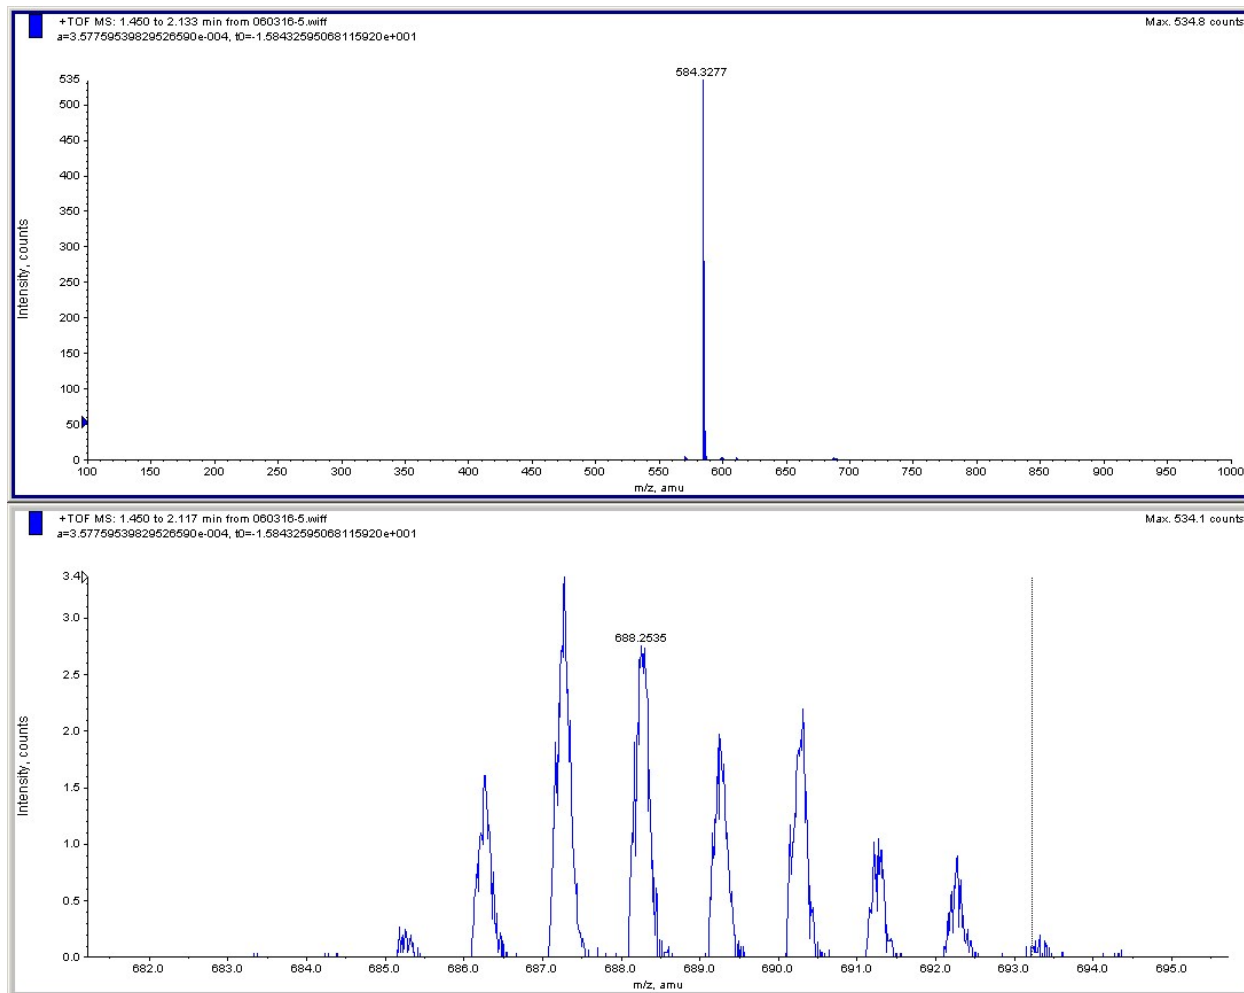

Figure S93. ESI MS of palladium(II) complex **18b**.

|                                                          |               |                                                 |                        |                                 |                     |
|----------------------------------------------------------|---------------|-------------------------------------------------|------------------------|---------------------------------|---------------------|
| Selected Isotopes : $\text{C H N}_{0.3} \text{Ag}_{0.1}$ |               | Error Limit : 5 ppm                             |                        | Unsaturation Limits : -.5 to 30 |                     |
| <u>Measured Mass</u>                                     | <u>% Base</u> | <u>Formula</u>                                  | <u>Calculated Mass</u> | <u>Error</u>                    | <u>Unsaturation</u> |
| 659.2428                                                 | 100.0%        | $\text{C}_{39}\text{H}_{42}\text{N}_3\text{Ag}$ | 659.2430               | -0.3                            | 20.0                |

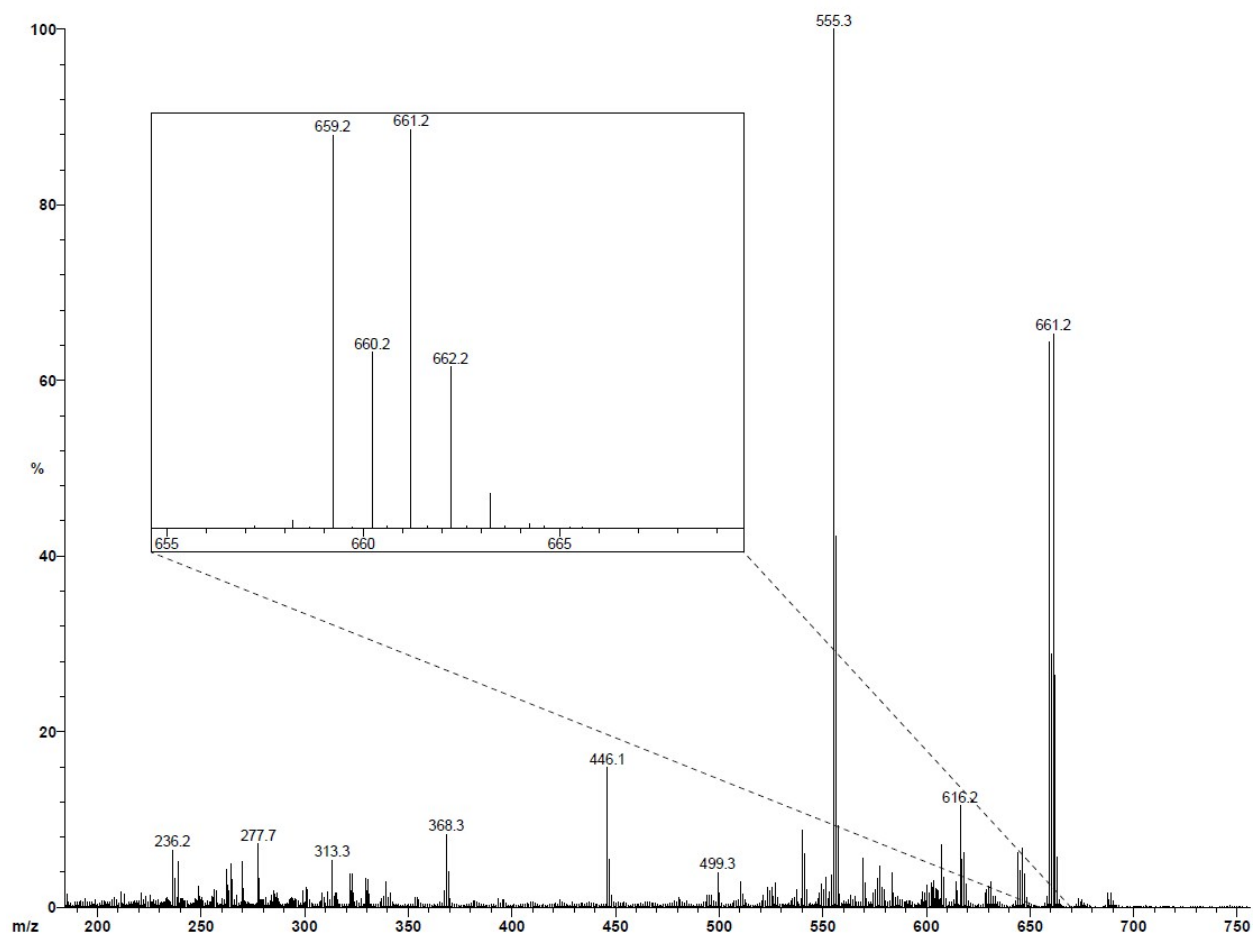

Figure S94. ESI MS of silver(III) *tert*-butylbenzocarbaporphyrin **21a**.



Selected Isotopes :  $\text{C H N}_{0.3} \text{Ag}_{0.1} \text{O}_{0.1}$ 

Error Limit : 5 ppm

Unsaturation Limits : -.5 to 30

| <u>Measured Mass</u> | <u>% Base</u> | <u>Formula</u>                                   | <u>Calculated Mass</u> | <u>Error</u> | <u>Unsaturation</u> |
|----------------------|---------------|--------------------------------------------------|------------------------|--------------|---------------------|
| 687.2376             | 100.0%        | $\text{C}_{40}\text{H}_{42}\text{N}_3\text{AgO}$ | 687.2379               | -0.4         | 21.0                |

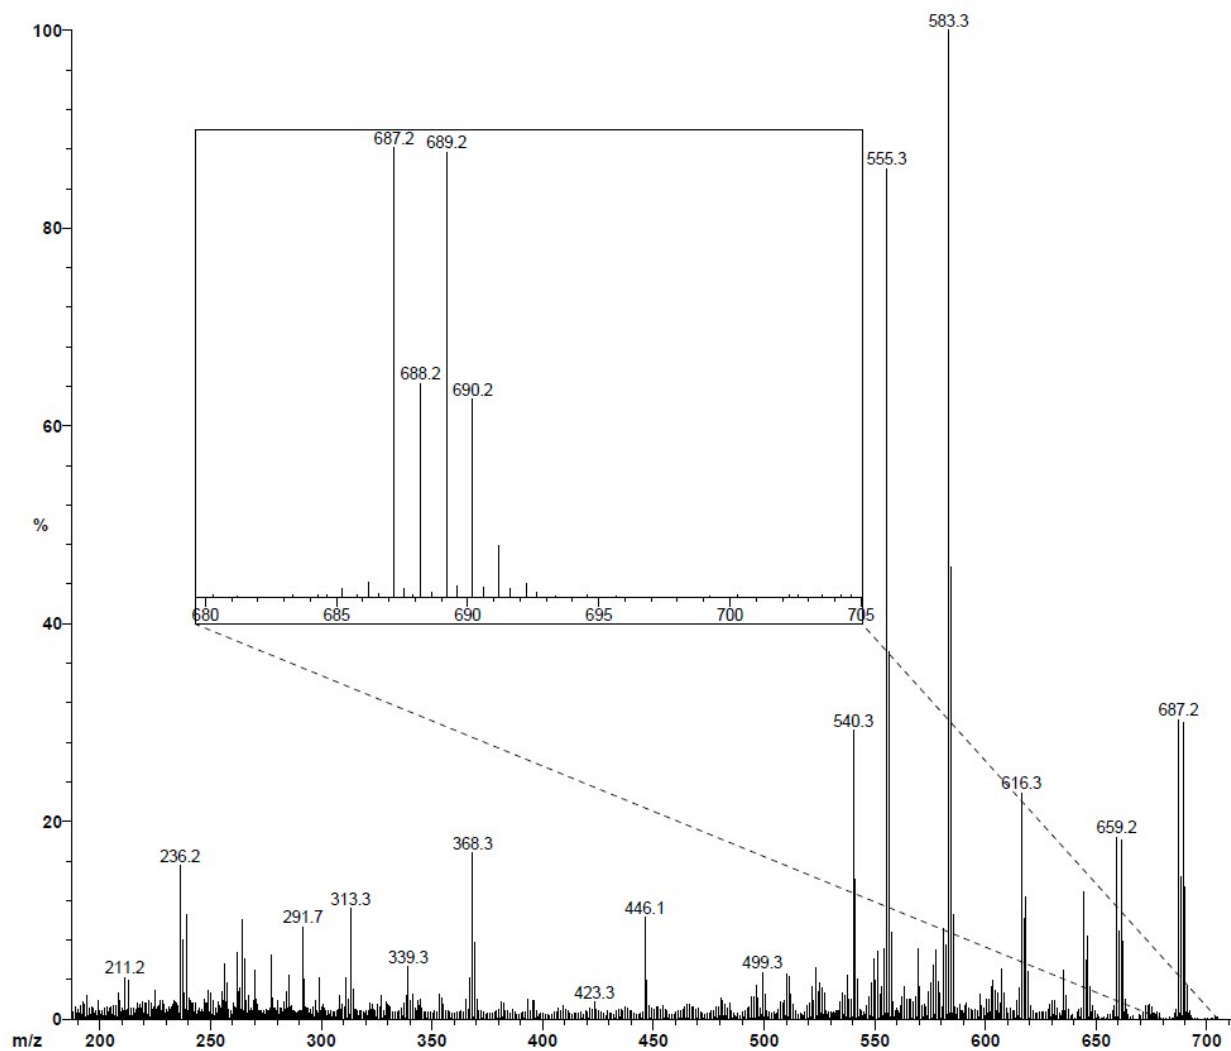Figure S95. ESI MS of silver(III) *tert*-butylbenzocarbaporphyrin carbaldehyde **21b**.

Selected Isotopes : C H N<sub>0.3</sub> Ag<sub>0.1</sub> O<sub>0.1</sub>

Error Limit : 5 ppm

Unsaturation Limits : -5 to 30

| <u>Measured</u><br><u>Mass</u> | <u>% Base</u> | <u>Formula</u>                                     | <u>Calculated</u><br><u>Mass</u> | <u>Error</u> | <u>Unsaturation</u> |
|--------------------------------|---------------|----------------------------------------------------|----------------------------------|--------------|---------------------|
| 631.1731                       | 31.2%         | C <sub>36</sub> H <sub>34</sub> N <sub>3</sub> AgO | 631.1753                         | -3.5         | 21.0                |

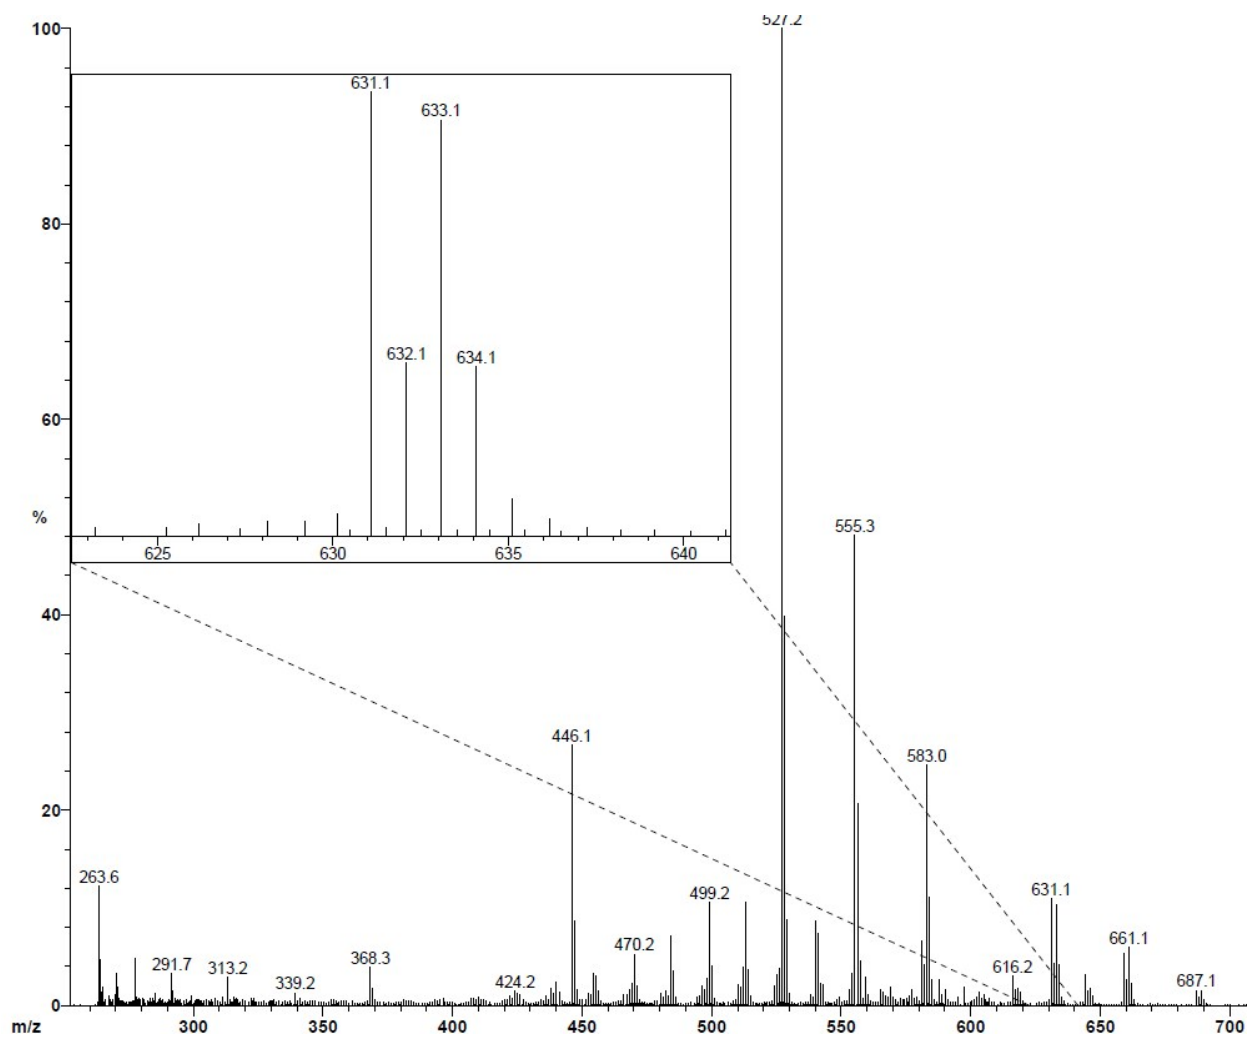Figure S96. ESI MS of silver(III) benzocarbaporphyrin 2<sup>1</sup>-carbaldehyde **22c**.

Selected Isotopes :  $\text{C}_{0.1}\text{H}_{0.1}\text{N}_{0.4}\text{Ag}_{0.1}$ 

Error Limit : 5 ppm

Unsaturation Limits : -5 to 30

| <u>Measured Mass</u> | <u>% Base</u> | <u>Formula</u>                                            | <u>Calculated Mass</u> | <u>Error</u> | <u>Unsaturation</u> |
|----------------------|---------------|-----------------------------------------------------------|------------------------|--------------|---------------------|
| 631.1763             | 4.0%          | $\text{C}_{36}\text{H}_{34}\text{O}_3\text{N}_3\text{Ag}$ | 631.1753               | 1.6          | 21.0                |

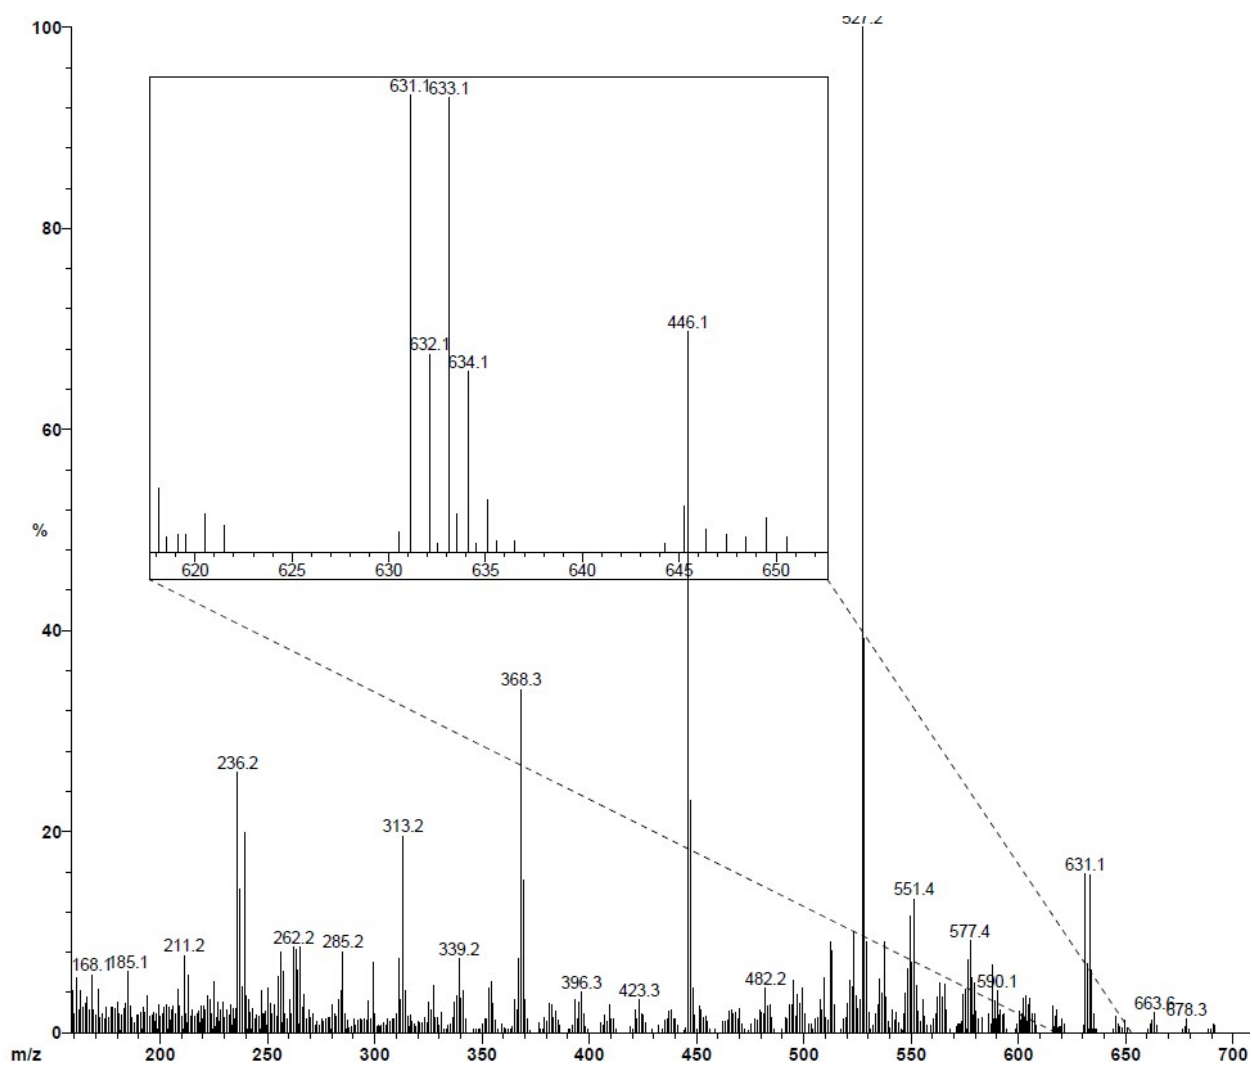Figure S97. ESI MS of silver(III) benzocarbaporphyrin 2<sup>2</sup>-carbaldehyde **22b**.

Selected Isotopes :  $\text{C H O}_{0.1} \text{N}_{0.4} \text{Ag}_{0.1}$ 

Error Limit : 5 ppm

Unsaturation Limits : -.5 to 30

| <u>Measured</u><br><u>Mass</u> | <u>% Base</u> | <u>Formula</u>                                  | <u>Calculated</u><br><u>Mass</u> | <u>Error</u> | <u>Unsaturation</u> |
|--------------------------------|---------------|-------------------------------------------------|----------------------------------|--------------|---------------------|
| 603.1816                       | 17.8%         | $\text{C}_{37}\text{H}_{36}\text{O Ag}$         | 603.1817                         | -0.2         | 19.5                |
|                                |               | $\text{C}_{35}\text{H}_{34}\text{N}_3\text{Ag}$ | 603.1804                         | 2.0          | 20.0                |

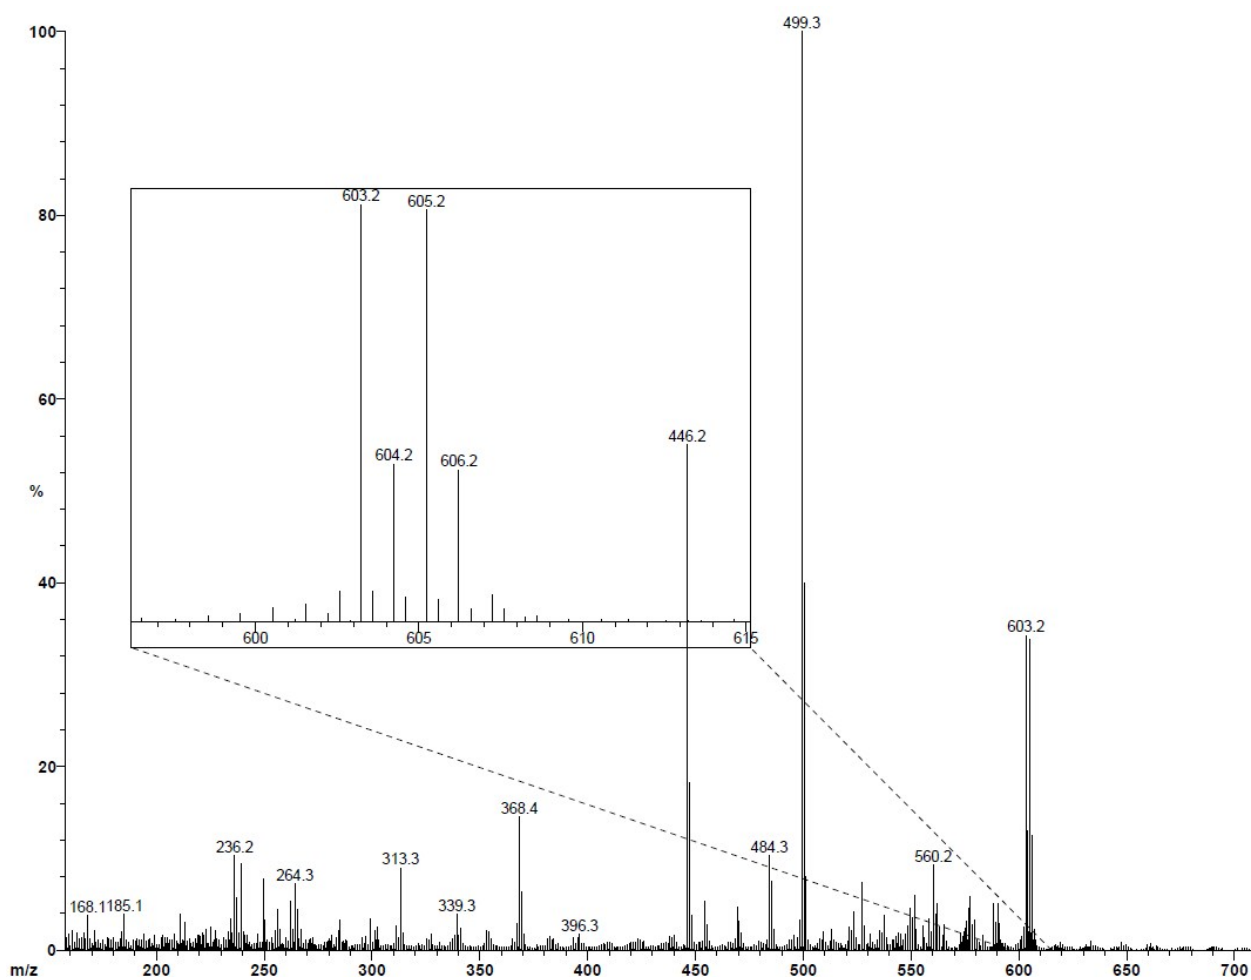Figure S98. ESI MS of silver(III) benzocarbaporphyrin **22a**.

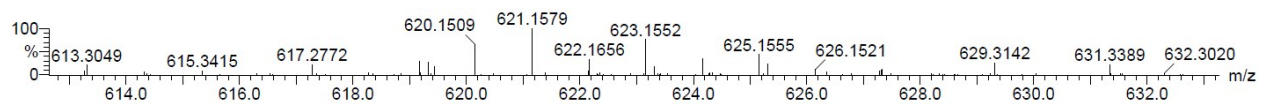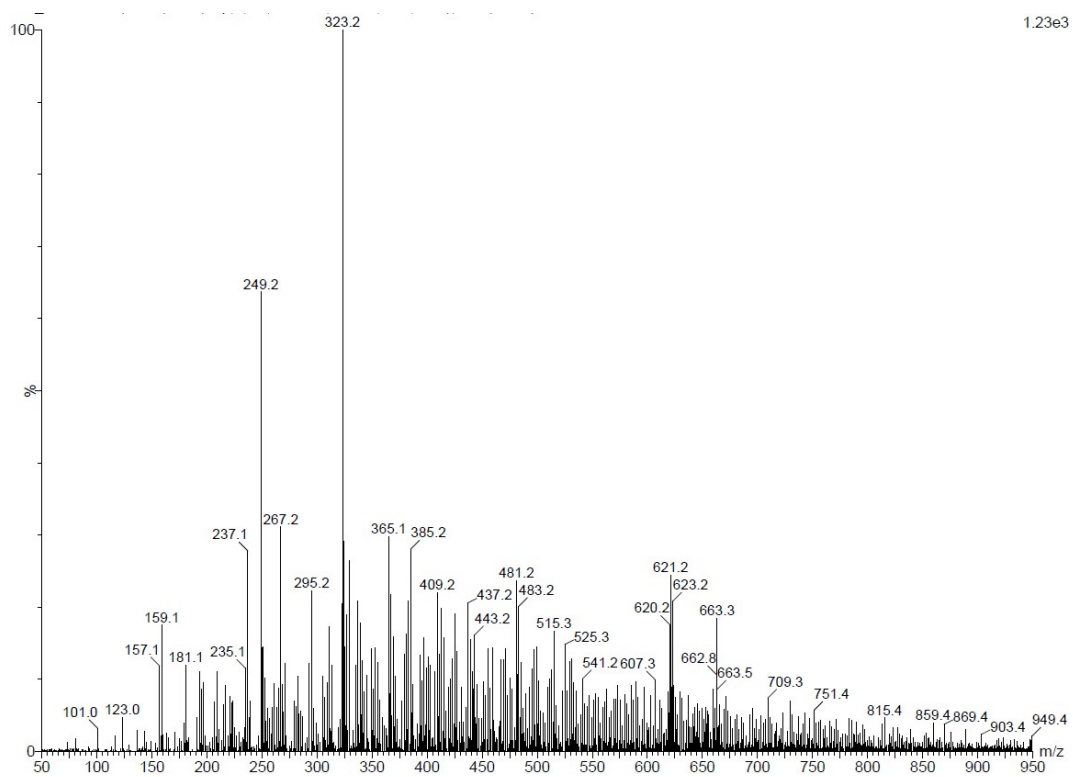

Figure S99. ESI MS of palladium(II) *tert*-butylbenzothiocarbaporphyrin **29a**.

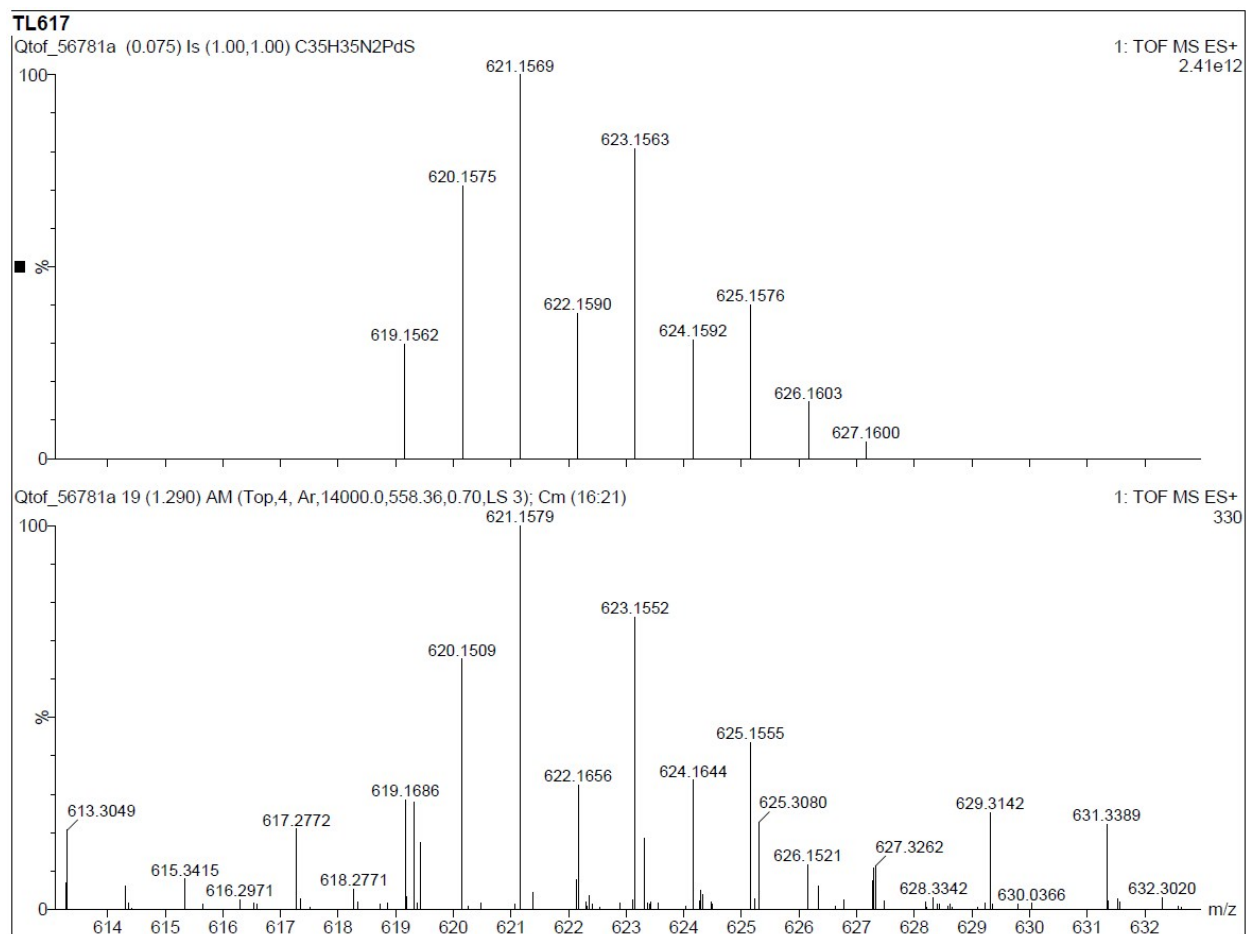

Figure S100. Analysis of the isotope peaks for the previous palladium complex.

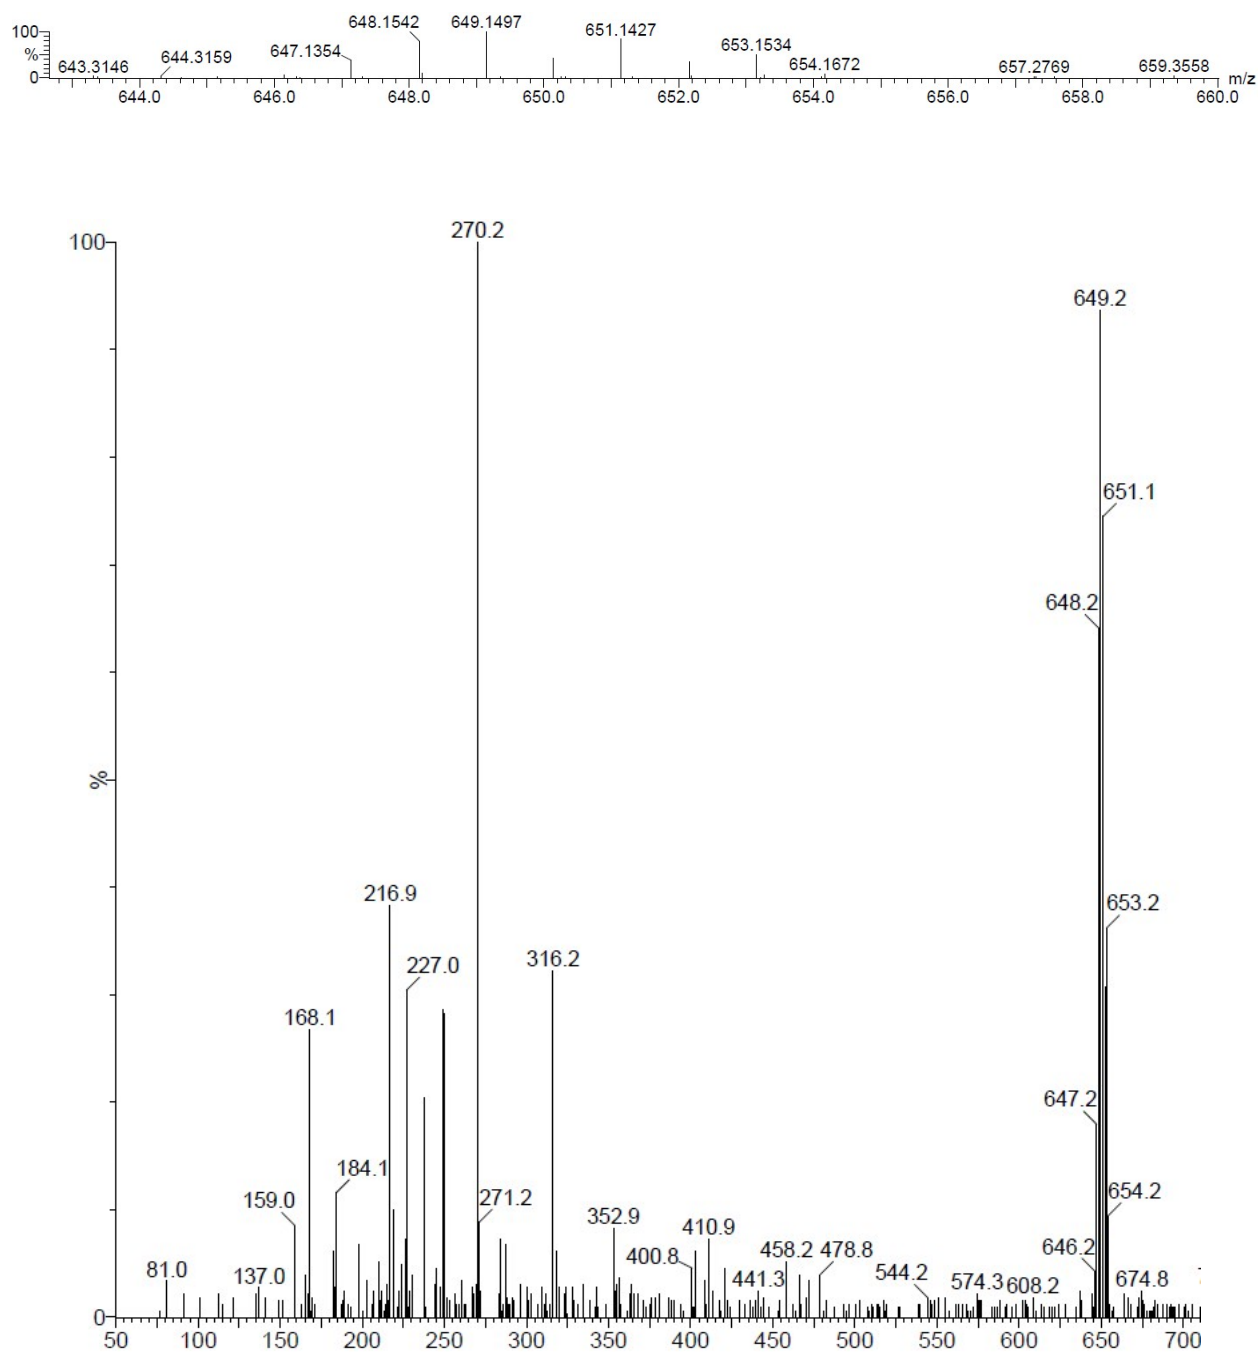

Figure S101. ESI MS of palladium(II) *tert*-butylbenzothiocarbaporphyrin carbaldehyde **29b**.

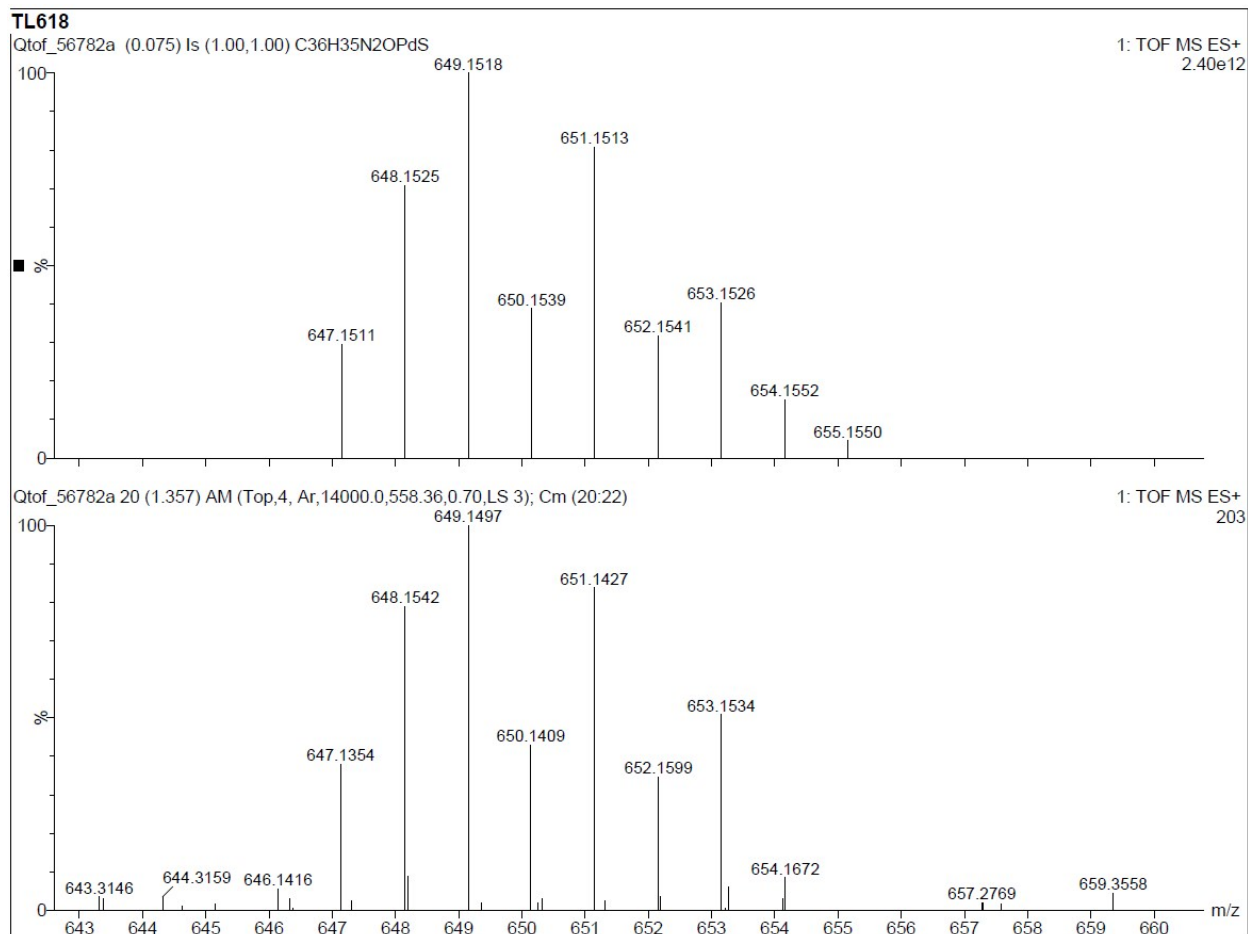

Figure S102. Analysis of the isotope peaks for the previous palladium complex.



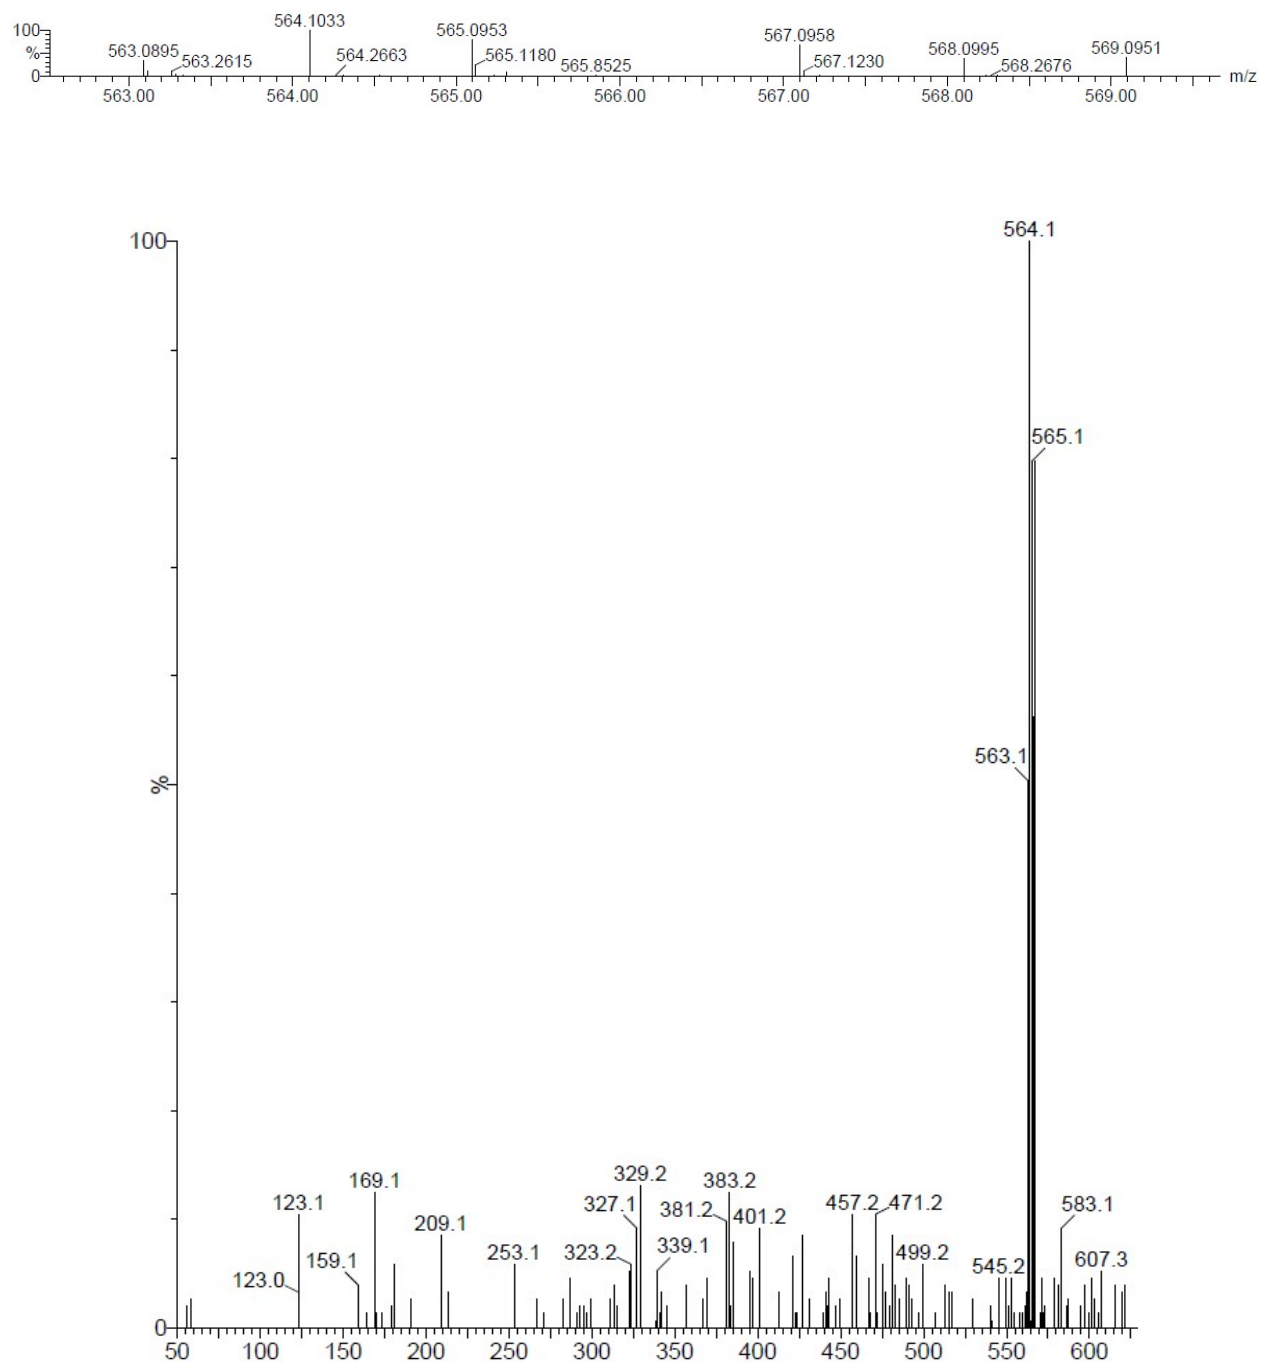

Figure S103. ESI MS of palladium(II) benzothiocarbaporphyrin **29c**.

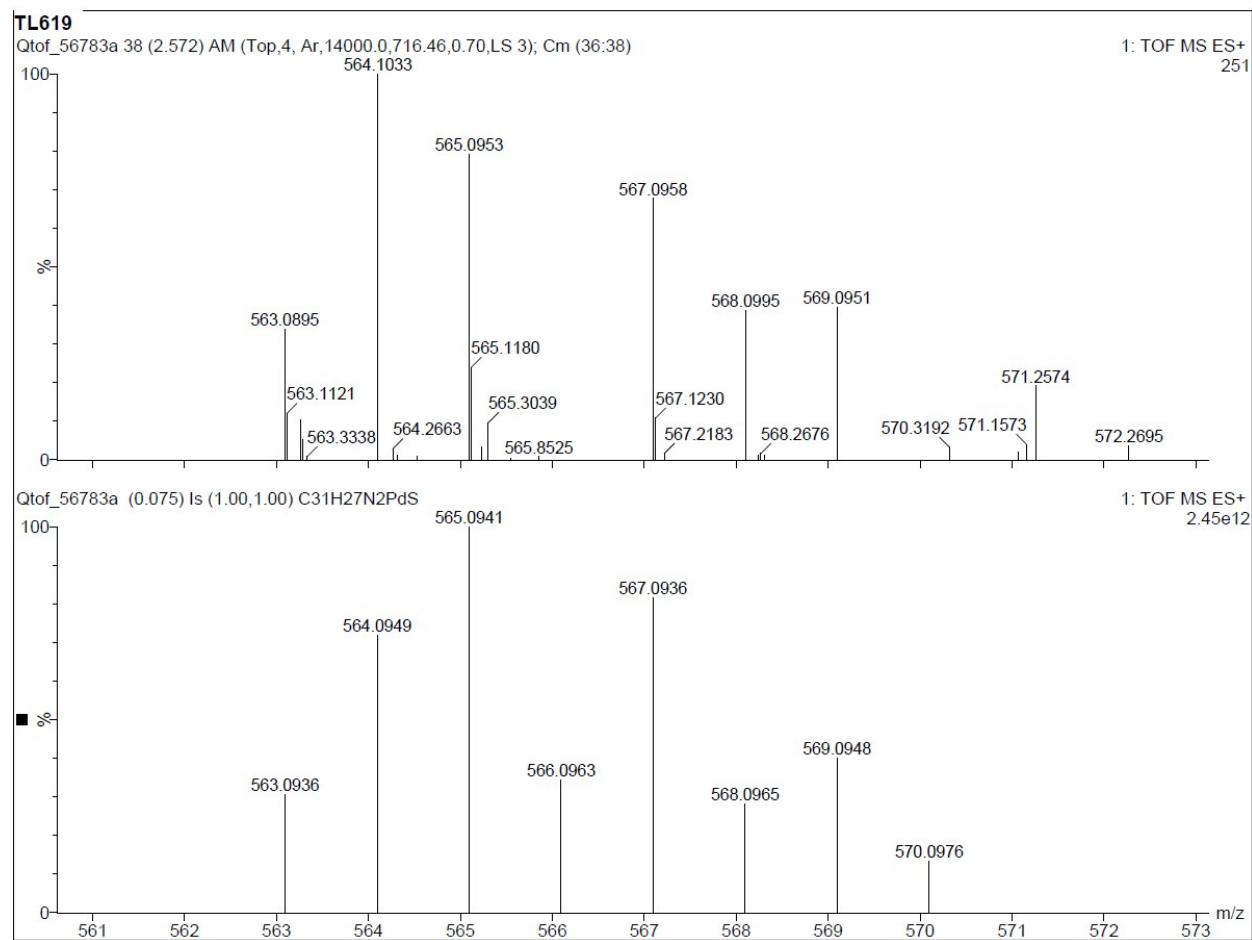

Figure S104. Analysis of the isotope peaks for the previous palladium complex.

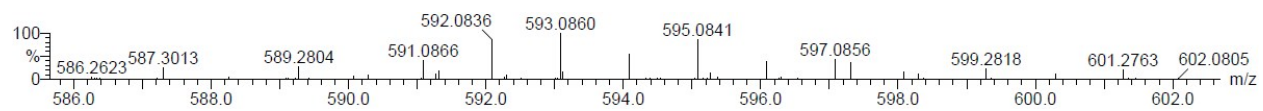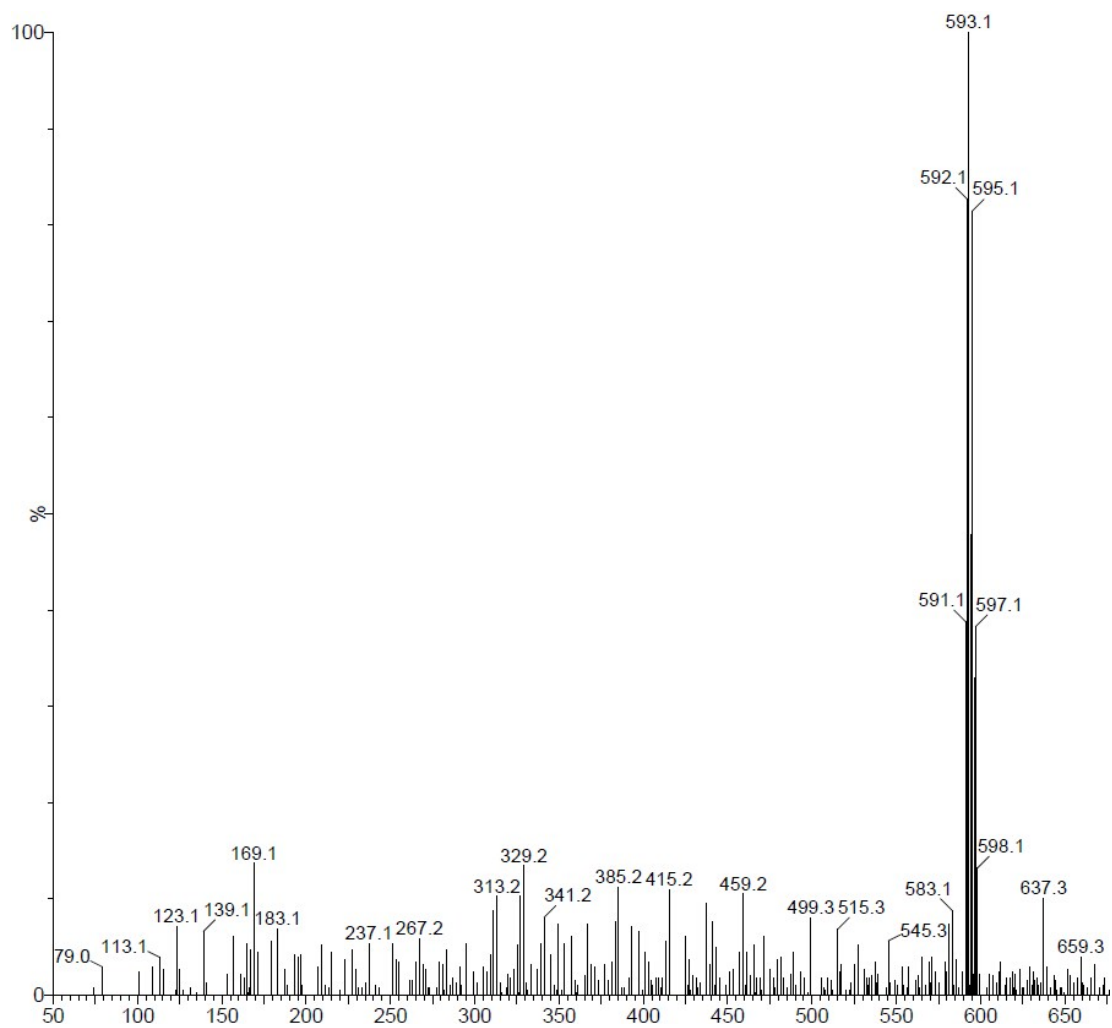

Figure S105. ESI MS of palladium(II) benzothiocarbaporphyrin carbaldehyde **29d**.

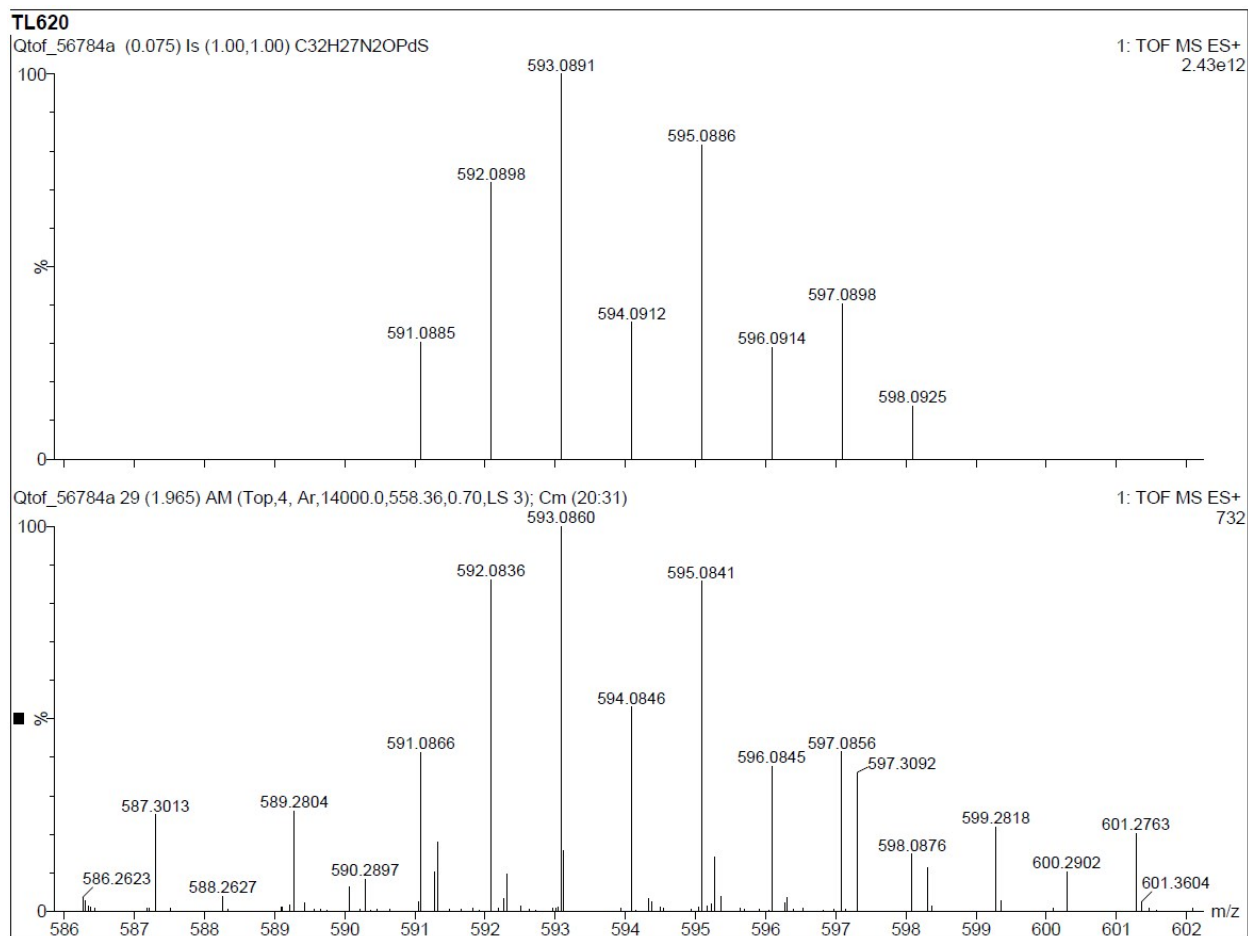

Figure S106. Analysis of the isotope peaks for the previous palladium complex.
